# Supplementary material for: Molecular mechanism to target the endosomal Mon1-Ccz1 GEF complex to the pre-autophagosomal structure
Source: eLife. 2018 Feb 15;7:e31145. doi: 10.7554/eLife.31145 (PMC5841931; doi:10.7554/eLife.31145)
Supplement: Figure 1—source data 1. [file elife-31145-fig1-data1.xlsx]

## Sheet: Sheet1
Fig1F
Ccz1 coloc/Atg8 dots
				mean	sted
wt	0.1	0.0862069	0.114286	0.100164	0.0114637
wt-str	0.0833333	0.0833333	0.1	0.0888889	0.00785674
vam3∆	0.142857	0.121212	0.148148	0.137406	0.0116526
vam3∆-str	0.322917	0.284615	0.298077	0.30187	0.0158648
vam3∆ vam3ts	0.1	0.155172	0.142857	0.132677	0.0236465
vam3∆ vam3ts str	0.328125	0.269231	0.333333	0.31023	0.0290685
vps11-1	0.121212	0.153846	0.142857	0.139305	0.0135575
vps11-1 str	0.322581	0.320755	0.36	0.334445	0.0180854
				mean	sted
wt	10	8.62	11.43	10.0167	1.14724
wt-str	8.33	8.33	10	8.88667	0.787246
vam3∆	14.29	12.12	14.81	13.74	1.16502
vam3∆-str	32.29	28.46	29.81	30.1867	1.58611
vam3∆ vam3ts	10	15.52	14.29	13.27	2.36614
vam3∆ vam3ts str	32.81	26.92	33.33	31.02	2.9069
vps11-1	12.12	15.38	14.29	13.93	1.35502
vps11-1 str	32.26	32.08	36	33.4467	1.80697
ccz1 and atg8
	nomal	starved		nomal -sted	starved-sted
wt	10.0167	8.88667		1.14724	0.787246
vam3∆	13.74	30.1867		1.16502	1.58611
vam3∆ vam3ts 37°C	13.27	31.02		2.36614	2.9069
vps11-1 37°C	13.93	33.4467		1.35502	1.80697
Fig1I
Ypt7 and Atg8								mean	sted
wt	0.177778	0.149733	0.201439		17.78	14.97	20.14	17.63	2.11331
wt-str	0.323529	0.274336	0.22449		32.35	27.43	22.45	27.41	4.04168
vam3∆	0.125	0.0744681	0.117647		12.5	7.45	11.76	10.57	2.22676
vam3∆-str	0.314741	0.338462	0.302013		31.47	33.85	30.2	31.84	1.5129
Ypt7 and Atg8
	nomal	starved		nomal -sted	starved-sted
wt	17.63	27.41		2.11331	4.04168
vam3∆	10.57	31.84		2.22676	1.5129
