# Supplementary material for: Molecular mechanism to target the endosomal Mon1-Ccz1 GEF complex to the pre-autophagosomal structure
Source: eLife. 2018 Feb 15;7:e31145. doi: 10.7554/eLife.31145 (PMC5841931; doi:10.7554/eLife.31145)
Supplement: Figure 1—source data 2. [file elife-31145-fig1-data2.xlsx]

## Sheet: Sheet1
0 min									0	5	10	15	20	25	30	35	40
Total Atg8	Colicalization dots		STDEV.P	Total vps21	Colicalization dots		STDEV.P	Atg8	10.65	14.78	15	15.31	19.32	19.67	24.23	25.93	27.73
16	2	0.125		46	32	0.695652		Vps21	70.63	55.89	52.73	49.21	43.89	41.39	36.24	34.07	32.27
17	2	0.117647		47	35	0.744681
26	2	0.0769231		56	38	0.678571			2.11	2.89	1.36	1.14	0.97	1.95	1.7	1.89	1.98
		0.106523	0.0211447			0.706301	0.0280199		2.8	0.98	1.94	3.6	5.02	0.51	0.49	2.13	2.83
5 min				5 min
18	2	0.111111		52	29	0.557692
20	3	0.15		56	32	0.571429
11	2	0.181818		42	23	0.547619
		0.147643	0.0289141			0.558913	0.00975847
10 min				10 min
18	3	0.166667		52	28	0.538462
30	4	0.133333		46	25	0.543478
40	6	0.15		48	24	0.5
		0.15	0.0136083			0.527313	0.0194217
15 min				15 min
36	5	0.138889		41	22	0.536585
26	4	0.153846		58	26	0.448276
30	5	0.166667		57	28	0.491228
		0.153134	0.0113514			0.49203	0.0360567
20 min				20 min
20	4	0.2		66	26	0.393939
39	7	0.179487		55	28	0.509091
30	6	0.2		58	24	0.413793
		0.193162	0.00966984			0.438941	0.0502612
25 min				25 min
35	7	0.2		60	25	0.416667
32	7	0.21875		55	23	0.418182
35	6	0.171429		59	24	0.40678
		0.196726	0.0194571			0.413876	0.00505588
30min				30min
32	7	0.21875		66	24	0.363636
31	8	0.258065		68	25	0.367647
28	7	0.25		59	21	0.355932
		0.242272	0.0169549			0.362405	0.00486116
35min				35min
33	8	0.242424		62	21	0.33871
32	8	0.25		68	25	0.367647
35	10	0.285714		57	18	0.315789
		0.25938	0.0188766			0.340715	0.0212182
40min				40min
32	8	0.25		56	20	0.357143
27	8	0.296296		66	19	0.287879
28	8	0.285714		65	21	0.323077
		0.277337	0.0198069			0.3227	0.0282782
