# Supplementary material for: Molecular mechanism to target the endosomal Mon1-Ccz1 GEF complex to the pre-autophagosomal structure
Source: eLife. 2018 Feb 15;7:e31145. doi: 10.7554/eLife.31145 (PMC5841931; doi:10.7554/eLife.31145)
Supplement: Figure 1—source data 3. [file elife-31145-fig1-data3.xlsx]

## Sheet: Sheet1
Starved-2h	OD400	OD400	OD400	mean	SD
atg9∆	0.25	0.2	0.198	0.216	0.0240555
wt	1.93	1.95	1.156	1.67867	0.369671
vps21∆	0.71	0.66	0.626	0.665333	0.0344996
Starved-4h
atg9∆	0.168	0.17	0.152	0.163333	0.00805536
wt	7.99	8.1	7.814	7.968	0.117791
vps21∆	1.47	1.45	1.412	1.444	0.0240555
	Starved-2h	Starved-4h
atg9∆	0.216	0.163333
wt	1.67867	7.968
vps21∆	0.665333	1.444
