# Supplementary material for: Molecular mechanism to target the endosomal Mon1-Ccz1 GEF complex to the pre-autophagosomal structure
Source: eLife. 2018 Feb 15;7:e31145. doi: 10.7554/eLife.31145 (PMC5841931; doi:10.7554/eLife.31145)
Supplement: Figure 2—source data 1. [file elife-31145-fig2-data1.xlsx]

## Sheet: Sheet1
Fig2A										coloc/ape1	coloc/ape1	coloc/ape1	mean	SD
									wt	3.24	5.3	4.68	4.40667	0.862915
Ccz1/Ape1									wt-str	4.36	4.38	5.4	4.71333	0.485615
									vam3∆	4.54	1.48	8.75	4.92333	2.98032
									vam3∆-str	13	29.5	18.7	20.4	6.84251
									vam3∆atg1∆	12.5	10.5	3	8.66667	4.08928
									vam3∆atg1∆-str	27.3	29	22.6	26.3	2.70678
									vam3∆atg18∆	19.5	19	20	19.5	0.408248
									vam3∆atg18∆-str	20	20	18.5	19.5	0.707107
									vam3∆atg16∆	3.06	12.2	3.3	6.18667	4.2532
									vam3∆atg16∆-str	1.85	6.25	10	6.03333	3.33075
									vam3∆atg12∆	3.85	6.25	4.25	4.78333	1.04987
									vam3∆atg12∆-str	4.88	5.88	3.33	4.69667	1.04907
									vam3∆atg8∆	4.54	10	9.5	8.01333	2.46449
									vam3∆atg8∆-str	6.25	5.89	6.25	6.13	0.169706
									vam3∆atg4∆	6.25	7.5	10	7.91667	1.55902
									vam3∆atg4∆-str-	10.5	9	8.3	9.26667	0.917727
									vam3∆atg14∆	12.55	12.9	11.1	12.1833	0.779245
									vam3∆atg14∆-str-	29.69	26.67	27.78	28.0467	1.24725
									vam3∆atg2∆	6.9	10.34	7.89	8.37667	1.44592
									vam3∆atg2∆-str	25.64	27.59	28.57	27.2667	1.21782
									vam3∆atg9∆	11.54	12	7.41	10.3167	2.06389
									vam3∆atg9∆-str	26.67	23.53	30.78	26.9933	2.96862
									vam3∆atg18∆	9.5	10	9.7	9.73333	0.20548
									vam3∆atg18∆-str	33.33	23.53	20	25.62	5.63905
	unstarved	starved	unstarved-sd	starved-sd
wt	4.68	5.4	0.86	0.48
vam3∆	4.92	20.4	2.98	6.84
vam3∆atg1∆	8.67	26.3	4.09	2.7
vam3∆atg16∆	6.18	6.03	4.25	3.33
vam3∆atg8∆	8.01	6.13	2.46	0.17
vam3∆atg4∆	7.92	9.27	1.56	0.92
vam3∆atg14∆	12.18	28.05	0.78	1.25
vam3∆atg2∆	8.37	27.27	1.45	1.22
vam3∆atg9∆	10.32	27	2.06	2.97
vam3∆atg18∆	9.73	25.62	0.21	5.64
Fig2B
Ypt7/Ape1	coloc/ape1	coloc/ape1	coloc/ape1	mean	SD
wt-unstr	15	14.88	20	16.6267	2.38581
wt-str	38.46	40	25	34.4867	6.73748
vam3∆-unstr	15.6	23	5.55	14.7167	7.15126
vam3∆-str	18	25	33.33	25.4433	6.26629
vam3∆atg1∆-unstr	10.03	6.67	10.07	8.92333	1.59343
vam3∆atg1∆-str	30	42.86	36.06	36.3067	5.25297
vam3∆atg16∆un-str	8.9	10.5	10.5	9.96667	0.754247
vam3∆atg16∆-str	10	8.33	13.33	10.5533	2.0784
vam3∆atg8∆-unstr	5.94	8.53	8.82	7.76333	1.29472
vam3∆atg8∆-str	6.67	12.5	5.88	8.35	2.95216
vam3∆atg4∆-unstr	8.33	7.26	15.6	10.3967	3.70515
vam3∆atg4∆-str-	6.67	15.78	11.9	11.45	3.73273
vam3∆atg14∆-str-	15.38	15.09	12.5	14.3233	1.29472
vam3∆atg14∆	8.82	13.33	15.38	12.51	2.74016
	unstarved	starved	unstarved-sd	starved-sd
wt	16.63	34.49	2.39	6.73
vam3∆	14.7	25.44	7.15	6.27
vam3∆atg1∆	8.92	36.3	1.59	5.25
vam3∆atg16∆	9.96	10.55	0.75	2.08
vam3∆atg8∆	7.76	8.35	1.29	2.95
vam3∆atg4∆	10.4	11.45	3.71	3.73
vam3∆atg14∆	12.51	14.32	2.74	1.29
