# Supplementary material for: Molecular mechanism to target the endosomal Mon1-Ccz1 GEF complex to the pre-autophagosomal structure
Source: eLife. 2018 Feb 15;7:e31145. doi: 10.7554/eLife.31145 (PMC5841931; doi:10.7554/eLife.31145)
Supplement: Figure 2—source data 2. [file elife-31145-fig2-data2.xlsx]

## Sheet: Sheet1
		GFP-Atg8	Mon1-Ccz1		GFP-Atg8	Mon1-Ccz1	MC1/Atg8	MC1/Atg8
wt	Normal	57.567	201.386		145.354	1.53467	0.0105582	1
	Starved	46.495	184.646		156.426	18.2747	0.116827	11.0651
atg4∆	Normal	42.187	201.157		160.734	1.76367	0.0109726	1.03925
	Starved	46.158	201.514		156.763	1.40667	0.00897322	0.849886
Background	203.007
	202.857
	202.898
	202.921
		GFP-Atg8	Mon1-Ccz1		GFP-Atg8	Mon1-Ccz1	MC1/Atg8	MC1/Atg8
wt	Normal	46.143	162.223		120.534	4.45433	0.0369549	1
	Starved	44.483	138.071		122.194	28.6063	0.234105	6.33489
atg4∆	Normal	78.713	160.453		87.9643	6.22433	0.0707597	1.91476
	Starved	68.202	165.268		98.4753	1.40933	0.0143115	0.38727
Background	166.936
	166.481
	166.615
	166.677
		GFP-Atg8	Mon1-Ccz1		GFP-Atg8	Mon1-Ccz1	MC1/Atg8	MC1/Atg8
wt	Normal	50.683	164.097		116.986	3.57167	0.0305308	1
	Starved	39.406	136.777		128.263	30.8917	0.240847	7.88865
atg4∆	Normal	45.245	165.437		122.424	2.23167	0.018229	0.597071
	Starved	34.814	159.469		132.855	8.19967	0.0617191	2.02153
Background	168.031
	167.888
	167.087
	167.669
	wt-Normal	wt-Starved	atg4∆-Normal	atg4∆-Starved
	1	11.0651	1.03925	0.849886
		6.33489	1.91476	0.38727				mean			SD
		7.88865	0.597071	2.02153				wt	atg4∆		wt	atg4∆
mean	1	8.42953	1.18369	1.08623			normal	1	1.18369		0.568885	0.547554
SD	0.568885	1.96859	0.547554	0.687798			starved	8.42953	1.08623		1.96859	0.687798
