# Supplementary material for: Molecular mechanism to target the endosomal Mon1-Ccz1 GEF complex to the pre-autophagosomal structure
Source: eLife. 2018 Feb 15;7:e31145. doi: 10.7554/eLife.31145 (PMC5841931; doi:10.7554/eLife.31145)
Supplement: Figure 2—source data 3. [file elife-31145-fig2-data3.xlsx]

## Sheet: Sheet1
	Mon1-Ccz1	Mon1-Ccz1	Mon1-Ccz1∆C	Mon1-Ccz1∆C			Mon1-Ccz1	Mon1-Ccz1	Mon1-Ccz1∆C	Mon1-Ccz1∆C
Bakgound	GST	GST-Atg8	GST	GST-Atg8		Bakgound	GST	GST-Atg8	GST	GST-Atg8
221.065	220.065	114.956	219.729	207.004			1	105.994	1.221	14.061
224.98	214.462	62.443	223.264	222.599			10.518	162.537	1.716	2.381
225	200.726	37.857	221.829	202.991			24.274	187.143	3.171	22.009
224.992	214.959	60.375	223.695	187.073			10.033	164.617	1.297	37.919
							Mon1-Ccz1	Mon1-Ccz1	Mon1-Ccz1∆C	Mon1-Ccz1∆C
							GST	GST-Atg8	GST	GST-Atg8
							1	15.45	0.163	0.226
							1	7.71	0.127	0.88
							1	16.41	0.122	3.79
							1	13.19	0.137333	1.632
						STDEV.P	6.60193	3.89471	0.0182635	1.54912
							GST	GST-Atg8	GST	GST-Atg8
							1	13.19	0.137	1.632
