# Supplementary material for: Molecular mechanism to target the endosomal Mon1-Ccz1 GEF complex to the pre-autophagosomal structure
Source: eLife. 2018 Feb 15;7:e31145. doi: 10.7554/eLife.31145 (PMC5841931; doi:10.7554/eLife.31145)
Supplement: Figure 2—source data 4. [file elife-31145-fig2-data4.xlsx]

## Sheet: Sheet1
starved-3h				mean	SD
atg8∆	0.348	0.34	0.373	0.353667	0.0140554
wt	1.158	1.14	1.566	1.288	0.196713
I21R	1.036	0.844	1.524	1.13467	0.286242
	OD400	SD
atg8∆	0.353667	0.0140554
wt	1.288	0.196713
I21R	1.13467	0.286242
