# Supplementary material for: Molecular mechanism to target the endosomal Mon1-Ccz1 GEF complex to the pre-autophagosomal structure
Source: eLife. 2018 Feb 15;7:e31145. doi: 10.7554/eLife.31145 (PMC5841931; doi:10.7554/eLife.31145)
Supplement: Figure 3—source data 1. [file elife-31145-fig3-data1.xlsx]

## Sheet: Sheet1
	Atg8 dots	Total cells	dots/cell			Atg8 dots	Total cells	dots/cell			Atg8 dots	Total cells	dots/cell			Atg8 dots	Total cells	dots/cell
wt-37°C	4	13	0.307692		LIR1-37°C	72	12	6		LIR2-37°C	100	20	5		LIR1 LIR2	64	9	7.11111
	4	12	0.333333			60	9	6.66667			115	16	7.1875			53	8	6.625
	7	11	0.636364			68	11	6.18182			120	20	6			98	16	6.125
	5	9	0.555556			73	11	6.63636			84	17	4.94118			56	8	7
	7	13	0.538462			67	11	6.09091			80	16	5			64	10	6.4
MEAN			0.474281					6.31515					5.62574					6.65222
STDEV.P			0.130087					0.280757					0.875316					0.36711
	Atg8 dots	Total cells				Atg8 dots	Total cells				Atg8 dots	Total cells
wt-30°C	2	14	0.142857		LIR1-30°C	4	25	0.16		LIR2-30°C	6	21	0.285714
	6	42	0.142857			4	22	0.181818			4	16	0.25
	2	34	0.0588235			5	27	0.185185			5	18	0.277778
	2	32	0.0625			3	19	0.157895			3	11	0.272727
MEAN			0.101759					0.171225					0.271555
STDEV.P			0.0411182					0.0123572					0.0132778
			STDEV.P	STDEV.P
	30°C	37°C	30°C	37°C
wt	0.101759	0.474281	0.0411182	0.130087
LIR1	0.171225	6.31515	0.0123572	0.280757
LIR2	0.271555	5.62574	0.0132778	0.875316
LIR1 LIR2	6.65222		0.36711
