# Supplementary material for: Molecular mechanism to target the endosomal Mon1-Ccz1 GEF complex to the pre-autophagosomal structure
Source: eLife. 2018 Feb 15;7:e31145. doi: 10.7554/eLife.31145 (PMC5841931; doi:10.7554/eLife.31145)
Supplement: Figure 4—source data 1. [file elife-31145-fig4-data1.xlsx]

## Sheet: Sheet1
	23-total cells	1-3 vacuoles	4-6 vacuoles	>7 vacuoles						23-total cells	1-3 vacuoles	4-6 vacuoles	>7 vacuoles						23-total cells	1-3 vacuoles	4-6 vacuoles	>7 vacuoles					23-total cells	1-3 vacuoles	4-6 vacuoles	>7 vacuoles
wt	14	7	7	0	0.5	0.5	0		LIR1	25	14	9	2	0.56	0.36	0.08		LIR2	19	10	6	3	0.526316	0.315789	0.157895	LIR1 LIR2	9	2	2	5	0.222222	0.222222	0.555556
	36	16	17	3	0.444444	0.472222	0.0833333			20	9	9	2	0.45	0.45	0.1			17	8	7	2	0.470588	0.411765	0.117647		14	2	4	8	0.142857	0.285714	0.571429
	30	15	12	3	0.5	0.4	0.1			26	12	10	4	0.461538	0.384615	0.153846			16	8	5	3	0.5	0.3125	0.1875		7	1	1	5	0.142857	0.142857	0.714286
	32	12	17	3	0.375	0.53125	0.09375			18	6	9	3	0.333333	0.5	0.166667			11	5	4	2	0.454545	0.363636	0.181818		8	1	2	5	0.125	0.25	0.625
					0.454861	0.475868	0.0692708							0.451218	0.423654	0.125128							0.487862	0.350923	0.161215		7	1	1	5	0.142857	0.142857	0.714286
																															0.155159	0.20873	0.636111
																															0.0342375	0.0574287	0.0678513
	37-total cells	1-3 vacuoles	4-6 vacuoles	>7 vacuoles						37-total cells	1-3 vacuoles	4-6 vacuoles	>7 vacuoles						37-total cells	1-3 vacuoles	4-6 vacuoles	>7 vacuoles
wt	14	10	4	0	0.714286	0.285714	0		LIR1	11	5	3	3	0.454545	0.272727	0.272727		LIR2	20	9	7	4	0.45	0.35	0.2
	11	6	4	1	0.545455	0.363636	0.0909091			11	5	4	2	0.454545	0.363636	0.181818			17	7	5	5	0.411765	0.294118	0.294118
	10	5	4	1	0.5	0.4	0.1			12	5	4	3	0.416667	0.333333	0.25			19	9	7	3	0.473684	0.368421	0.157895
	10	5	4	1	0.5	0.4	0.1			11	5	5	1	0.454545	0.454545	0.0909091			15	7	5	3	0.466667	0.333333	0.2
					0.564935	0.362338	0.0727273							0.445076	0.356061	0.198864							0.450529	0.336468	0.213003
37 °C
	1-3 vacuoles	4-6 vacuoles	>7 vacuoles
wt	0.564935	0.362338	0.0727273
LIR1	0.445076	0.356061	0.198864
LIR2	0.438029	0.336468	0.225503
LIR1 LIR2	0.155159	0.20873	0.636111
					STDEV.P
	1-3 vacuoles	4-6 vacuoles	>7 vacuoles
wt	56.49	36.23	7.27		0.0214275	0.017142	0.0042855
LIR1	44.51	35.61	19.88		0.016402	0.065608	0.0707381
LIR2	45.05	33.65	21.3		0.0239768	0.0274203	0.0498865
LIR1 LIR2	15.52	20.87	63.61		0.0342375	0.0574287	0.0678513
					2.14	1.71	0.43
					1.64	6.56	4.06
					2.3	2.74	5.13
					3.42	5.74	6.78
