# Supplementary material for: Molecular mechanism to target the endosomal Mon1-Ccz1 GEF complex to the pre-autophagosomal structure
Source: eLife. 2018 Feb 15;7:e31145. doi: 10.7554/eLife.31145 (PMC5841931; doi:10.7554/eLife.31145)
Supplement: Figure 5—source data 1. [file elife-31145-fig5-data1.xlsx]

## Sheet: 20170427mc1_single mt_gef assay
##BLOCKS= 1
Plate:		1	Medium	2
Time	B1	B2	C1	C4	D2	D3	D4	D5	E2	E5		Time	No GTP	No GEF	No GTP	20 nM wt	10 nM wt	No GEF	80 nM wt	20 nM LIR1	10 nM LIR1	80 nM LIR1
00:00:00	1825.48	1631.4	2004.91	1824.58	1678.61	1635.05	1482.98	1599.2	1731.52	1844.17		0	1.03487	1.04832	1.04343	1.08244	1.03896	1.04005	1.03396	1.03825	1.03073	1.02256
00:01:00	1800.98	1601.34	1970.55	1828.67	1660.03	1621.36	1449.47	1578.32	1708.36	1814.48		1	1.02099	1.03495	1.02928	1.06795	1.02933	1.0321	1.02171	1.03416	1.02416	1.01825
00:02:00	1795.72	1586.3	1936.34	1833.26	1650.92	1606.53	1431.89	1573.84	1699.06	1782.88		2	1.01946	1.02241	1.02082	1.05875	1.02758	1.02584	1.02022	1.02928	1.02146	1.01491
00:03:00	1790.25	1575.48	1924.8	1852.36	1645.58	1592.62	1431.83	1565.24	1688.03	1769.33		3	1.01504	1.02481	1.0181	1.05219	1.02335	1.0211	1.0111	1.02195	1.01739	1.00979
00:04:00	1794.27	1564.15	1918.8	1871.21	1637.07	1584.63	1418.95	1565.19	1678.88	1757.72		4	1.00896	1.01446	1.01221	1.04112	1.02556	1.01856	1.01762	1.02322	1.01586	1.01545
00:05:00	1789.09	1564.05	1907.08	1895.76	1629.58	1580.63	1409.92	1554.76	1675.71	1732.05		5	1.00685	1.00987	1.01205	1.03469	1.01862	1.01669	1.01033	1.01615	1.01502	1.00999
00:06:00	1778.18	1540.48	1898.95	2009.92	1622.68	1565.53	1399.57	1544.11	1660.13	1709.13		6	1.00621	1.00859	1.00801	1.02948	1.01494	1.01094	1.00646	1.01115	1.00663	1.00509
00:07:00	1767.94	1534.62	1883.33	2065.21	1604.99	1551.62	1385.62	1529.58	1640.05	1692.16		7	0.999044	0.999206	1.00229	1.01817	1.01449	1.01307	1.0061	1.00705	1.00789	1.00525
00:08:00	1760.11	1532.28	1874.86	2126.36	1595.76	1541.42	1374.66	1521.11	1630.08	1687.64		8	0.997804	0.997244	1.00131	1.01031	1.00716	1.01052	1.00116	1.01232	1.00688	1.00495
00:09:00	1752.18	1524.43	1862.6	2179.15	1593.66	1535.27	1365.09	1510.43	1622.48	1676.6		9	0.996722	0.998598	1.00018	1.00617	1.01138	1.01012	1.00481	1.01087	1.00549	1.00585
00:10:00	1743.74	1509.12	1855.63	2159.74	1588.82	1530.01	1354.83	1502.59	1610.12	1665.68		10	1	1	1	1	1	1	1	1	1	1
00:11:00	1725.08	1497.49	1834.63	2186.61	1568.93	1510.76	1340.9	1490.91	1597.54	1652.23		11	0.988333	1.06951	0.989388	0.892692	0.964472	1.08131	0.522833	0.923219	0.995813	0.746996
00:12:00	1719.37	1496.65	1822.54	2195.45	1559.89	1502.01	1328.58	1482.08	1584.29	1645.32		12	0.976955	1.04033	0.978569	0.847296	0.940634	1.06877	0.48389	0.881213	0.955572	0.643919
00:13:00	1697.5	1459.27	1787.13	2183.67	1542.13	1475.95	1293.58	1462.97	1562.77	1621.72		13	0.979897	1.03904	0.982737	0.820761	0.903701	1.06347	0.462772	0.844572	0.932677	0.59296
00:14:00	1683.14	1440.01	1773.13	2171.51	1534.22	1467.53	1289.57	1451.41	1555.76	1619.8		14	0.977423	1.01439	0.982858	0.782309	0.874956	1.05527	0.449709	0.818146	0.921326	0.557637
00:15:00	1677.89	1449.11	1774.1	2180.88	1528.42	1467.56	1286.35	1456.51	1555.62	1613.39		15	0.980877	1.00131	0.981242	0.755294	0.852354	1.04452	0.435219	0.778503	0.905459	0.533382
00:16:00	1663.82	1434.01	1760.38	2165.01	1522.21	1459.99	1277.49	1444.94	1540.23	1602.14		16	0.975243	0.993932	0.976376	0.725326	0.836626	1.03687	0.427267	0.755839	0.901968	0.517114
00:17:00	1671.48	1429.35	1755.18	2177.03	1527.27	1460.84	1272.38	1446.76	1535.29	1606.02		17	0.981905	0.989011	0.97628	0.708413	0.81019	1.01917	0.423028	0.735357	0.890331	0.503341
00:18:00	1653.4	1411.64	1738.63	2141	1504.43	1449.31	1259.93	1428.12	1522.94	1591.5		18	0.974821	0.976375	0.970024	0.678588	0.789962	1.01369	0.416369	0.720769	0.885129	0.49367
00:19:00	1648.41	1417.65	1735.72	2141.77	1504.83	1443.08	1250.15	1429.72	1516.94	1595.72		19	0.977821	0.966484	0.968374	0.662602	0.767332	1.0021	0.411438	0.698409	0.868639	0.485448
00:20:00	1651.45	1405.18	1734.3	2126.6	1501.77	1442.01	1251.91	1422.13	1518.26	1599.21		20	0.974551	0.961727	0.966378	0.643707	0.760191	1.0018	0.408749	0.688383	0.865292	0.43024
00:21:00	1630.7	1390.7	1707.71	2086.72	1486.58	1419.27	1231.83	1404.52	1496.24	1567.84		21	0.977809	0.951893	0.973388	0.629238	0.739525	0.990684	0.404128	0.666331	0.85376	0.41863
00:22:00	1638.98	1391.21	1717.28	2086.64	1488.51	1431.87	1231.2	1411.71	1500.14	1577.25		22	0.971924	0.950164	0.975009	0.617424	0.725643	0.980856	0.401487	0.643519	0.839513	0.414454
00:23:00	1617.01	1373.47	1694	2058.72	1476.79	1415.37	1216.18	1391.58	1483.98	1567.34		23	0.969579	0.936873	0.967532	0.605125	0.70889	0.970561	0.400939	0.630482	0.831131	0.413043
00:24:00	1614.58	1356.83	1680.07	2040.97	1463.11	1404.55	1201.77	1386.1	1474.53	1560.73		24	0.965395	0.940736	0.967757	0.59159	0.699453	0.974944	0.40415	0.625076	0.822922	0.413123
00:25:00	1607.59	1360.02	1675.59	2028.34	1460.62	1396.03	1200.01	1379.55	1470.63	1555.62		25	0.963529	0.92101	0.968026	0.584334	0.687259	0.963195	0.402156	0.600923	0.803389	0.408068
00:26:00	1597.96	1346.29	1665.9	2006.99	1454.61	1389.58	1189.29	1369.73	1464.78	1547.77		26	0.958774	0.913058	0.96189	0.575284	0.674566	0.956871	0.397446	0.590682	0.793797	0.404852
00:27:00	1594.61	1340.19	1665.64	1994.59	1457.74	1386.13	1196.96	1371.42	1462.58	1556.44		27	0.95191	0.903513	0.958967	0.561688	0.666965	0.954615	0.397843	0.585026	0.782095	0.402782
00:28:00	1593.61	1338.49	1658.99	1984.56	1447.89	1383.58	1188.38	1361.95	1461.36	1548.08		28	0.953031	0.911061	0.959633	0.556277	0.656287	0.950457	0.397991	0.565398	0.771009	0.401762
00:29:00	1582.25	1326.04	1649.58	1962.75	1442.65	1375.75	1183.83	1355.26	1449.29	1540.57		29	0.94213	0.901067	0.959741	0.544789	0.649689	0.946976	0.397508	0.558942	0.761563	0.401738
00:30:00	1580.29	1323.43	1647.96	1947.59	1442.01	1378.65	1183.4	1349.76	1451.1	1540.81		30	0.939437	0.902629	0.956086	0.537143	0.635963	0.942221	0.394421	0.550022	0.746583	0.397952
00:31:00	1578.57	1325.23	1646.11	1939.61	1431.59	1375.18	1177.6	1356.82	1449.64	1540.35		31	0.930497	0.883271	0.952457	0.527444	0.633412	0.938571	0.398209	0.540966	0.736335	0.400671
00:32:00	1583.76	1327.09	1645.81	1927.72	1437.59	1374.63	1181.89	1354.88	1447.64	1541.74		32	0.930251	0.886437	0.9583	0.524369	0.62181	0.932678	0.39054	0.530845	0.725136	0.395539
00:33:00	1565.29	1419.34	1628.34	1720.86	1421.42	1360.87	1176.23	1340.31	1439.74	1532.76		33	0.925586	0.877701	0.949507	0.521223	0.614326	0.928049	0.388708	0.518557	0.716955	0.395481
00:34:00	1547.27	1380.61	1610.53	1633.35	1370.92	1471.51	614.973	1237.4	1433.71	1144.97		34	0.92318	0.868647	0.950063	0.511619	0.607675	0.922612	0.389763	0.512715	0.707481	0.396302
00:35:00	1551.93	1378.9	1617.39	1582.2	1337.03	1454.46	569.167	1181.1	1375.78	986.976		35	0.917744	0.869127	0.951061	0.507513	0.602531	0.920229	0.391239	0.501767	0.698671	0.394655
00:36:00	1548.01	1346.19	1617.59	1508.07	1284.54	1447.24	544.328	1131.99	1342.81	908.867		36	0.91621	0.861398	0.945184	0.502306	0.591824	0.915086	0.39124	0.49478	0.690656	0.392724
00:37:00	1553.48	1328.83	1614.93	1455.99	1243.68	1436.09	528.962	1096.57	1326.47	854.726		37	0.911505	0.855848	0.940996	0.493607	0.587718	0.907277	0.385373	0.488838	0.683862	0.392629
00:38:00	1544.55	1319.04	1606.93	1398.22	1211.55	1421.45	511.919	1043.43	1303.63	817.548		38	0.912361	0.856983	0.945806	0.49057	0.586575	0.909087	0.389667	0.484833	0.681342	0.393593
00:39:00	1555.11	1312.51	1606.77	1365.62	1189.19	1411.04	502.565	1013.06	1298.6	792.613		39	0.916596	0.849073	0.94833	0.490032	0.57928	0.902444	0.391201	0.478357	0.674266	0.389342
00:40:00	1543.89	1295.74	1596.47	1308.13	1151.62	1386.96	497.579	985.606	1281.85	771.503		40	0.914316	0.844149	0.944183	0.485537	0.571716	0.898808	0.388381	0.472801	0.671204	0.392583
00:41:00	1548.64	1282.61	1593.76	1277.31	1122.87	1379.5	489.747	966.053	1274.36	756.679		41	0.915462	0.846319	0.944123	0.48424	0.569027	0.894671	0.387565	0.469733	0.663151	0.390099
00:42:00	1543.46	1276.3	1590.47	1240.89	1090.7	1363.72	483.947	936.084	1250.61	744.077		42	0.913723	0.844678	0.943584	0.477948	0.566352	0.897642	0.389085	0.466806	0.658918	0.392557
00:43:00	1548.62	1263.25	1602.01	1212.99	1080.55	1363.32	480.784	922.646	1245.8	659.456		43	0.917635	0.83742	0.945728	0.474476	0.559142	0.887723	0.38534	0.460847	0.648976	0.38884
00:44:00	1539.3	1260.95	1604.68	1190.22	1051.17	1348.19	475.349	893.09	1229.19	641.661		44	0.911356	0.834144	0.943391	0.47384	0.556678	0.888442	0.387303	0.460258	0.649781	0.392137
00:45:00	1535.59	1243.32	1592.37	1166.51	1031.44	1334.81	472.242	862.514	1208.68	635.26		45	0.916602	0.831107	0.943099	0.470507	0.552511	0.881328	0.384165	0.457521	0.6392	0.385973
00:46:00	1528.96	1248.44	1592.74	1140.42	1007.63	1320.8	471.598	845.041	1196.61	633.098		46	0.911573	0.826062	0.938604	0.467191	0.545842	0.877847	0.386486	0.452858	0.635555	0.387279
00:47:00	1526	1222.26	1593.18	1126.43	994.214	1326.77	475.374	837.795	1184.79	633.22		47	0.906437	0.823525	0.937395	0.460148	0.536842	0.870343	0.381608	0.447268	0.627133	0.387705
00:48:00	1518.47	1211.71	1583.09	1108.99	976.881	1310.78	473.029	805.422	1156.67	625.472		48	0.903002	0.813047	0.931653	0.45542	0.53753	0.873608	0.38104	0.446164	0.626606	0.387754
00:49:00	1507.6	1199.04	1578.27	1082.78	958.84	1302.17	467.489	791.696	1142.86	620.543		49	0.910987	0.815368	0.94087	0.453759	0.532379	0.859211	0.379182	0.440101	0.617813	0.385116
00:50:00	1509.38	1209.06	1579.37	1072.35	948.036	1299.1	467.956	784.116	1126.01	617.37		50	0.902105	0.80539	0.931103	0.449912	0.527799	0.861788	0.382945	0.43967	0.611938	0.384798
00:51:00	1492.11	1195.8	1579.55	1050.2	932.858	1293.44	468.13	757.808	1110.05	615.807		51	0.902167	0.804004	0.928671	0.449939	0.527334	0.861994	0.380818	0.437031	0.609491	0.384972
00:52:00	1487.85	1197.87	1573.53	1035.46	923.479	1288.71	467.562	749.155	1096.45	615.769		52	0.904891	0.80305	0.93041	0.44652	0.521644	0.855678	0.383947	0.435036	0.605972	0.383233
00:53:00	1473.69	1172.18	1567.56	1016.76	903.969	1282.24	463.931	737.199	1074.89	609.966		53	0.902865	0.797913	0.930906	0.443323	0.518396	0.852266	0.383779	0.430156	0.600577	0.384603
00:54:00	1473.3	1176.38	1577.18	1010.84	900.342	1277.27	468.387	725.062	1060.13	614.134		54	0.898896	0.795778	0.924471	0.43964	0.516331	0.848116	0.382538	0.432501	0.601393	0.382707
00:55:00	1465.91	1164.79	1562.7	1004.77	883.851	1269.25	459.366	711.496	1044.01	606.268		55	0.903429	0.792983	0.932539	0.439505	0.512198	0.850585	0.38164	0.430067	0.592639	0.38586
00:56:00	1462.1	1152.77	1563.62	986.259	873.214	1262.95	457.211	695.027	1032.23	606.179		56	0.901445	0.790271	0.927783	0.435467	0.511516	0.847011	0.381383	0.428614	0.591608	0.382348
00:57:00	1453.49	1153.41	1565.26	978.343	863.759	1255.55	458.452	687.196	1018.59	607.437		57	0.903889	0.793982	0.929139	0.435004	0.508931	0.847928	0.380049	0.427675	0.587964	0.380513
00:58:00	1451.06	1143.15	1555.59	968.305	856.448	1252.31	460.188	672.523	1005.9	604.913		58	0.901112	0.784762	0.926559	0.430863	0.502596	0.833349	0.377723	0.423448	0.580847	0.38046
00:59:00	1443.61	1135.79	1548.7	951.537	841.229	1245.31	460.189	663.158	994.365	601.953		59	0.898719	0.781284	0.923503	0.428266	0.5047	0.839153	0.38442	0.425032	0.580999	0.383394
01:00:00	1444.96	1137.3	1556.61	945.681	835.392	1234.68	453.288	655.194	984.583	601.807		60	0.90246	0.781737	0.925481	0.430615	0.500119	0.836562	0.378797	0.419659	0.578256	0.380021
01:01:00	1451.67	1126.8	1560.77	944.644	833.768	1237.14	458.339	649.826	980.956	603.285		61	0.895565	0.77476	0.920217	0.425388	0.495742	0.829753	0.382636	0.419177	0.570929	0.379294
01:02:00	1448.06	1120.26	1553.94	935.979	823.399	1228.1	460.144	641.146	970.768	596.77		62	0.899383	0.773652	0.921016	0.423855	0.492734	0.825889	0.380501	0.420496	0.568652	0.380852
01:03:00	1449.88	1123.14	1553.84	933.479	812.647	1223.16	456.826	633.699	966.359	601.737		63	0.894306	0.770233	0.922762	0.422971	0.490862	0.825284	0.380922	0.418354	0.562827	0.379403
01:04:00	1447.12	1120.96	1552.96	921.349	808.824	1217.53	455.867	629.588	954.765	597.93		64	0.896368	0.767834	0.92071	0.417502	0.484596	0.817555	0.378603	0.41288	0.55917	0.377941
01:05:00	1453.32	1111.33	1556.48	914.656	805.023	1221.57	457.655	625.664	948.671	601.697		65	0.890815	0.757868	0.915867	0.414321	0.488406	0.81817	0.377642	0.414647	0.558894	0.379448
01:06:00	1443.37	1106.98	1552.64	913.43	794.774	1208.07	453.25	617.678	934.356	596		66	0.893981	0.762802	0.917889	0.415295	0.485605	0.815061	0.379287	0.413376	0.553313	0.379017
01:07:00	1451.68	1102.95	1552.16	907.006	791.272	1209.05	455.558	616.888	935.515	601.053		67	0.891483	0.752211	0.916235	0.413802	0.484568	0.804474	0.372938	0.41161	0.550583	0.376879
01:08:00	1443.72	1096.26	1544.76	900.613	785.349	1199.37	451.868	613.219	920.282	591.605		68	0.887515	0.752422	0.914457	0.410773	0.480894	0.807337	0.374632	0.410751	0.549559	0.376683
01:09:00	1435.58	1092.89	1542.77	887.037	775.869	1194.63	454.598	606.969	915.034	593.607		69	0.892445	0.752077	0.915386	0.411918	0.480558	0.801961	0.377766	0.410663	0.545944	0.377693
01:10:00	1430.14	1078.99	1533.32	877.922	763.077	1184.42	448.86	599.477	902.908	594.26		70	0.892787	0.750751	0.915007	0.409643	0.48044	0.803705	0.374115	0.408295	0.544116	0.375449
01:11:00	1442.79	1082.07	1548.49	874.72	764.054	1188.86	448.192	597.997	902.15	594.336		71	0.891056	0.747004	0.917029	0.408563	0.473191	0.801407	0.37432	0.406503	0.538905	0.374774
01:12:00	1428.72	1068.83	1532.41	867.305	756.733	1169.27	446.006	589.872	889.49	590.292		72	0.887778	0.744443	0.912882	0.407174	0.472321	0.791802	0.375943	0.404662	0.537153	0.376788
01:13:00	1428.82	1066.99	1528.41	867.356	750.222	1172.78	450.432	589.293	881.032	589.804		73	0.887481	0.737184	0.913925	0.403724	0.469328	0.787023	0.373979	0.403769	0.530338	0.377685
01:14:00	1433.13	1065.72	1531.27	860.765	749.561	1173.06	447.931	585.756	877.509	590.071		74	0.886572	0.737294	0.9094	0.400626	0.468312	0.784687	0.371756	0.403275	0.529184	0.374566
01:15:00	1429.92	1058.9	1532.09	854.602	741.474	1164.46	451.611	583.082	872.442	587.406		75	0.885956	0.729523	0.907467	0.398374	0.468127	0.782265	0.376438	0.404969	0.530131	0.374728
01:16:00	1423.64	1056.07	1521.5	847.502	736.857	1159.82	451.413	576.542	864.675	589.505		76	0.88497	0.732866	0.908472	0.398353	0.46457	0.778369	0.37257	0.399653	0.524498	0.373302
01:17:00	1430.82	1052.36	1534.78	847.242	733.922	1154.17	449.954	579.685	865.85	586.6		77	0.880865	0.728548	0.904291	0.393809	0.463253	0.78006	0.377501	0.402601	0.522244	0.37438
01:18:00	1427.68	1048.76	1526.95	839.459	728.047	1157.53	448.898	576.423	853.246	591.433		78	0.882596	0.727058	0.907323	0.394192	0.462471	0.775372	0.378657	0.401381	0.52168	0.376075
01:19:00	1431.55	1053.69	1529.18	838.565	727.077	1152.67	448.595	574.475	851.761	586.05		79	0.885727	0.727356	0.907476	0.393848	0.460685	0.775912	0.372901	0.397898	0.518819	0.374604
01:20:00	1427.15	1041.45	1524.94	830.584	723.403	1153.91	447.026	573.216	846.515	583.236		80	0.885097	0.72405	0.906943	0.392539	0.458661	0.772718	0.376259	0.39779	0.514371	0.374437
01:21:00	1423.36	1036.84	1519.91	825.577	714.399	1134.08	444.29	567.551	836.268	583.156		81	0.881392	0.719312	0.905051	0.388179	0.00136202	8.96489e-05	0.000256752	0.0014713	0.00191979	0.000724182
01:22:00	1429.28	1037.44	1523.16	830.105	717.389	1141.97	452.167	569.674	836.488	587.653		82	0.00118452	0.00177079	0.00103536	0.000819102	0.497271	0.825894	0.414365	0.434992	0.537416	0.397307
01:23:00	1418.36	1028.18	1514.5	820.028	710.877	1138.45	445.554	562.473	832.538	582.482		83	0.965302	0.747764	0.946358	0.359937	0.494957	0.805635	0.414024	0.432685	0.523303	0.394733
01:24:00	1424.41	1026.71	1515.81	817.074	704.656	1129.18	450.069	561.827	821.99	581.368		84	0.964601	0.738716	0.948869	0.358044	0.492062	0.796474	0.418366	0.432628	0.513763	0.395852
01:25:00	1416.37	1022.17	1518.69	815.37	700.38	1123.92	447.558	563.594	818.711	583.757		85	0.972628	0.731295	0.953324	0.353157	0.488543	0.774388	0.411495	0.430108	0.496917	0.395662
01:26:00	1419.63	1018.99	1515.31	804.827	697.72	1123.1	448.053	560.723	810.325	581.536		86	0.9671	0.717057	0.950529	0.348615	0.48042	0.761698	0.409925	0.424151	0.481175	0.393268
01:27:00	1410.84	1005.76	1507.34	798.694	688.813	1112.58	445.325	553.387	805.06	579.295		87	0.959916	0.706346	0.944925	0.344054	0.481428	0.750656	0.40756	0.422864	0.473694	0.388084
01:28:00	1415.86	1012.31	1510.67	800.572	694.228	1113.42	444.195	555.755	804.662	581.604		88	0.965847	0.701925	0.946035	0.344481	0.476164	0.738973	0.409232	0.422016	0.465489	0.389061
01:29:00	1411.9	998.253	1507.94	797.694	690.247	1109.19	446.13	554.052	796.627	580.944		89	0.96195	0.691136	0.953748	0.342725	0.472979	0.728756	0.405141	0.419614	0.455786	0.385207
01:30:00	1405.61	998.532	1505.02	791.855	688.773	1094.78	438.662	551.685	792.697	577.667		90	0.960522	0.684976	0.947397	0.33915	0.467761	0.713839	0.401986	0.416217	0.44201	0.384194
01:31:00	1413.42	998.074	1506.55	794.063	683.551	1098.68	440.655	550.533	791.222	577.366		91	0.954858	0.671855	0.939282	0.336274	0.463822	0.709659	0.40812	0.414378	0.432761	0.383041
01:32:00	1413.96	996.315	1505.92	789.677	683.073	1091.36	444.341	550.415	786.018	578.914		92	0.951354	0.666024	0.941611	0.333059	0.459458	0.694198	0.402214	0.413202	0.424281	0.379643
01:33:00	1411.22	991.342	1509.25	787.595	682.905	1093.73	440.046	547.242	783.386	575.475		93	0.947887	0.657271	0.933729	0.33305	0.458966	0.688124	0.400671	0.408807	0.416853	0.377271
01:34:00	1406.03	987.944	1502.43	784.918	672.602	1090.61	440.288	544.84	775.883	574.44		94	0.941738	0.651234	0.933991	0.332504	0.457076	0.683778	0.401699	0.41044	0.413227	0.379236
01:35:00	1405.56	978.31	1504.14	778.266	671.365	1077.54	442.196	542.372	773.361	577.527		95	0.947414	0.64423	0.934557	0.33237	0.456286	0.67491	0.402503	0.410081	0.407622	0.378328
01:36:00	1404.12	978.456	1496.7	772.294	667.111	1071.03	439.887	541.175	763.549	578.902		96	0.9449	0.642223	0.933406	0.331671	0.454447	0.672203	0.40754	0.409804	0.404173	0.380871
01:37:00	1403.14	968.143	1493.51	767.954	665.666	1067.85	437.272	540.513	761.888	574.122		97	0.947774	0.637705	0.933487	0.332652	0.452444	0.664777	0.403602	0.407326	0.398349	0.380463
01:38:00	1401.58	972.58	1495.17	767.914	665.403	1064.56	442.779	542.784	763.251	574.37		98	0.946331	0.629152	0.934246	0.331416	0.449492	0.657795	0.403146	0.403187	0.391541	0.380996
01:39:00	1395.08	966.849	1488.29	759.154	660.348	1059.26	438.229	535.659	755.141	572.184		99	0.944775	0.626139	0.931807	0.331771	0.446567	0.648229	0.402448	0.401886	0.387529	0.376852
01:40:00	1397.82	964.872	1493.28	759.891	658.476	1061.56	444.029	539.61	751.895	573.836		100	0.941344	0.615638	0.927872	0.329825	0.444948	0.637587	0.396824	0.402383	0.387187	0.37686
01:41:00	1402.78	965.268	1493.53	759.228	657.364	1055.18	445.389	537.974	751.084	576.434		101	0.940549	0.61191	0.930039	0.328025	0.43994	0.627703	0.396937	0.400937	0.380819	0.374056
01:42:00	1401.79	960.88	1492.65	756.705	654.826	1055.91	438.618	533.306	746.964	574.179		102	0.938027	0.602886	0.922671	0.330963	0.44038	0.622925	0.401619	0.399839	0.378355	0.378034
01:43:00	1395.92	954.592	1489.54	748.301	651.948	1051.57	442.568	533.161	740.56	573.923		103	0.9402	0.594584	0.924577	0.326791	0.434848	0.609767	0.394209	0.395277	0.37284	0.372124
01:44:00	1.876	2.35	1.704	1.579	1.936	0.122	0.302	1.972	2.764	1.11		104	0.931399	0.588532	0.918208	0.328051	0.433353	0.604239	0.39628	0.396529	0.375364	0.376826
01:45:00	1528.81	992.351	1557.52	693.857	706.829	1123.93	487.39	583.024	773.739	608.978		105	0.9332	0.583628	0.922871	0.326919	0.433254	0.592359	0.395899	0.395094	0.370474	0.374347
01:46:00	1527.7	980.343	1561.65	690.209	703.541	1096.36	486.989	579.932	753.42	605.032		106	0.933428	0.577968	0.921974	0.327228	0.43223	0.589466	0.397407	0.396028	0.371994	0.379023
01:47:00	1540.41	970.495	1568.99	680.788	699.426	1083.89	492.096	579.855	739.685	606.748		107	0.936412	0.57363	0.920658	0.329832	0.427575	0.576789	0.397902	0.393989	0.366943	0.376393
01:48:00	1531.66	951.6	1564.39	672.032	694.424	1053.84	484.014	576.478	715.431	606.456		108	0.934637	0.563388	0.918258	0.327483	0.421963	0.56199	0.395972	0.391954	0.367259	0.372242
01:49:00	1520.28	937.385	1555.16	663.239	682.877	1036.57	482.167	568.493	692.767	602.787		109	0.927012	0.555545	0.913275	0.326213	0.420221	0.556519	0.394537	0.387038	0.364032	0.371914
01:50:00	1529.67	931.519	1556.99	664.062	684.31	1021.54	479.386	566.769	681.996	594.841		110	0.929923	0.545269	0.910521	0.323402	0.417936	0.544902	0.39286	0.387769	0.36348	0.372625
01:51:00	1523.5	917.2	1569.68	660.678	676.827	1005.64	481.352	565.632	670.183	596.338		111	0.928044	0.539055	0.916373	0.325669	0.414315	0.537868	0.39595	0.390712	0.361897	0.373512
01:52:00	1521.24	909.026	1559.23	653.786	672.301	991.739	476.54	562.413	656.213	590.431		112	0.930191	0.534516	0.914086	0.326912	0.414877	0.5243	0.393743	0.386136	0.363553	0.373757
01:53:00	1512.27	891.613	1545.88	648.242	664.884	971.438	472.829	557.86	636.38	588.879		113	0.92517	0.522871	0.913153	0.328143	0.410457	0.517234	0.396751	0.386149	0.362626	0.374041
01:54:00	1506.72	883.874	1549.71	642.045	659.284	965.75	480.044	555.395	623.064	587.112		114	0.926425	0.516338	0.913103	0.323225	0.405794	0.506363	0.391703	0.382846	0.357915	0.370236
01:55:00	1501.23	872.258	1536.74	642.028	653.082	944.71	473.097	553.819	610.855	581.903		115	0.920225	0.502525	0.908063	0.323694	0.402579	0.49664	0.394166	0.381002	0.357944	0.3729
01:56:00	1491.49	864.247	1537.17	640.974	652.382	936.444	471.283	547.928	600.16	578.267		116	0.922527	0.495586	0.913998	0.323122	0.400471	0.485414	0.396123	0.380141	0.357383	0.374266
01:57:00	1500.48	854.952	1538.1	640.717	649.695	930.529	472.492	550.116	594.94	581.28		117	0.924885	0.488164	0.911994	0.32425	0.395951	0.47567	0.393243	0.378896	0.355726	0.372256
01:58:00	1496.5	852.289	1536.21	639.369	648.572	918.462	473.437	549.635	586.87	579.887		118	0.917653	0.47712	0.905566	0.321009	0.396673	0.467142	0.389761	0.38058	0.355995	0.371857
01:59:00	1501.05	846.292	1536.34	641.26	645.958	914.778	479.362	549.264	581.904	583.786		119	0.920695	0.471337	0.908212	0.3235	0.392466	0.460508	0.391143	0.375893	0.356498	0.372097
02:00:00	1498.77	834.942	1537.59	638.877	643.112	904.672	474.73	545.943	573.519	583.16		120	0.91509	0.460748	0.906221	0.323815	0.392163	0.453639	0.393739	0.375957	0.354686	0.3728
02:01:00	1496.3	830.943	1533.57	639.561	638.916	895.17	474.194	540.395	563.717	583.977		121	0.913439	0.455016	0.903986	0.321465	0.38532	0.44228	0.39187	0.373929	0.353455	0.370834
02:02:00	1490.87	817.007	1527.1	635.81	634.758	882.152	473.373	538.651	557.941	577.625		122	0.914913	0.447715	0.902012	0.321566	0.382155	0.440163	0.391961	0.373121	0.351921	0.37026
02:03:00	1489.61	812.06	1530.66	632.341	632.456	867.67	466.757	539.317	557.448	577.637		123	0.908277	0.440885	0.898184	0.317837	0.380048	0.434205	0.386784	0.370103	0.352563	0.369526
02:04:00	1485.61	800.084	1518.54	638.004	625.338	854.219	466.89	537.38	548.281	573.34		124	0.910268	0.434075	0.903244	0.322746	0.37884	0.430633	0.392886	0.370092	0.35348	0.37206
02:05:00	1489.06	789.067	1521.67	629.961	625.963	847.717	472.397	535.908	544.733	579.437		125	0.913123	0.430269	0.901643	0.321151	0.377192	0.422151	0.387411	0.367991	0.351218	0.370794
02:06:00	1475.12	781.036	1511.19	632.39	618.101	829.81	463.682	529.793	536.793	570.378		126	0.910427	0.422447	0.897971	0.319103	0.371526	0.413038	0.382842	0.367477	0.35187	0.368759
02:07:00	1477.97	774.528	1518.87	630.208	615.976	822.288	466.118	531.471	540.427	577.586		127	0.90406	0.414608	0.895485	0.318402	0.372084	0.413355	0.38682	0.365848	0.352205	0.369571
02:08:00	1478.33	767.016	1517.39	630.804	615.835	806.12	465.67	529.548	533.386	573.786		128	0.910473	0.415509	0.901105	0.322035	0.36819	0.410923	0.385756	0.36349	0.351086	0.370531
02:09:00	1483.06	761.259	1515.22	635.823	614.379	802.183	467.443	530.8	535.574	580.953		129	0.90605	0.408582	0.896087	0.321597	0.368871	0.403274	0.387109	0.362435	0.353562	0.372182
02:10:00	1480.24	747.667	1511.27	631.296	607.763	784.932	468.025	528.067	528.302	576.922		130	0.910258	0.405864	0.89976	0.31925	0.364223	0.397145	0.386515	0.362959	0.350899	0.368224
02:11:00	1468.17	737.259	1503.07	628.848	599.785	764.792	465.755	525.34	528.758	570.559
02:12:00	1472.78	723.622	1498.54	623.429	597.309	757.347	464.067	518.751	524.111	570.056
02:13:00	1469.8	715.375	1508.17	627.799	594.062	741.538	462.095	519.73	523.317	571.146
02:14:00	1473.2	709.352	1504.41	630.195	588.915	731.966	465.73	523.675	521.037	572.506
02:15:00	1465.25	693.898	1502.87	632.568	589.713	713.501	463.134	517.542	523.422	572.882
02:16:00	1467.24	685.228	1502.79	623.088	583.43	703.885	466.672	517.559	522.087	573.316
02:17:00	1457.42	666.896	1494.49	623.992	576.803	689.092	460.734	513.132	515.305	567.484
02:18:00	1461.07	657.688	1504.26	622.888	572.233	675.86	463.631	510.66	515.346	571.567
02:19:00	1464.8	647.838	1500.96	625.063	569.236	660.583	465.933	509.506	514.538	573.662
02:20:00	1453.35	633.181	1490.39	618.815	562.811	647.322	462.545	507.838	512.153	570.58
02:21:00	1458.16	625.507	1494.74	623.618	563.838	635.717	458.45	510.095	512.54	569.969
02:22:00	1449.29	611.455	1491.46	624.224	557.858	626.689	460.075	503.813	513.265	570.337
02:23:00	1446.67	603.848	1487.79	619.695	557.427	617.342	463.129	503.899	510.655	571.414
02:24:00	1449.01	594.159	1484.54	619.889	547.701	601.883	460.93	501.181	508.884	568.401
02:25:00	1438.5	585.095	1478.24	612.7	543.201	599.003	461.037	500.098	506.675	567.521
02:26:00	1441.65	576.057	1486.56	622.163	540.207	590.894	454.948	496.052	507.599	566.396
02:27:00	1446.17	571.006	1483.93	619.089	538.489	586.034	462.126	496.037	508.92	570.28
02:28:00	1441.9	560.626	1477.89	615.141	536.147	574.49	455.686	493.222	505.663	568.339
02:29:00	1431.82	550.223	1473.8	613.79	528.093	562.089	450.311	492.533	506.602	565.221
02:30:00	1441.97	551.418	1483.04	620.793	528.887	562.52	454.991	490.35	507.083	566.465
02:31:00	1434.97	542.225	1474.79	619.949	523.352	559.211	453.739	487.189	505.473	567.936
02:32:00	1441.63	538.619	1480.83	615.425	524.32	548.801	455.33	485.775	509.037	570.467
02:33:00	1437.64	530.774	1469.06	619.441	517.713	540.461	454.632	486.477	505.204	564.401
02:34:00	1433.35	528.351	1475.01	622.011	516.233	540.801	454.379	481.457	503.628	567.967
~End
Original Filename: 20170427mc1_single mt_gef assay in mlvs; Date Last Saved: 27.04.2017 18:51:56
