# Supplementary material for: Molecular mechanism to target the endosomal Mon1-Ccz1 GEF complex to the pre-autophagosomal structure
Source: eLife. 2018 Feb 15;7:e31145. doi: 10.7554/eLife.31145 (PMC5841931; doi:10.7554/eLife.31145)
Supplement: Figure 5—source data 2. [file elife-31145-fig5-data2.xlsx]

## Sheet: 20170503mc1_single mt_gef assay
##BLOCKS= 1
Plate:	60
Time	A10	B10	C8	C9	C10	D8	D9	D10	E9	F9	G9	H10			Time	4 nM wt+240 nM Atg8-His	4 nM LIR1+240 nM Atg8-His	No GTP	No GEF	4 nM wt+480 nM Atg8-His	No GTP	No GEF	4 nM LIR1+480 nM Atg8-His	4 nM wt	4 nM LIR1	4 nM wt	4 nM LIR1
00:20:00	1529.1	1458.28	1742.86	1508.68	1764.2	1310.05	1603.72	1597.33	1513.04	1282.25	1503.06	1583.54			0	1.03248	1.03459	1.03401	1.00308	0.981053	1.02162	1.00545	1.05411	1.04551	1.02635	1.03927	1.03884
00:21:00	1519.75	1439.05	1724.3	1505.72	1764.33	1298.67	1603.27	1530.59	1502.45	1270.64	1486.77	1572.86			1	1.02617	1.02095	1.03111	1.00661	0.991095	1.02476	1.01878	1.04849	1.04803	1.02905	1.02236	1.03074
00:22:00	1522.22	1444.75	1732.22	1511.98	1788.63	1302.16	1598.19	1547.76	1506.07	1273.98	1498.08	1584.57			2	1.02784	1.02499	1.02319	0.991922	0.982588	1.0168	1.00077	1.03549	1.05242	1.02972	1.02372	1.03481
00:23:00	1520.62	1445.24	1727.35	1517.32	1806.94	1306.16	1619.38	1539.51	1512.37	1274.81	1494.8	1579.3			3	1.02676	1.02534	1.02509	1.00947	0.994372	1.0231	1.01758	1.03872	1.04054	1.01812	1.01939	1.03009
00:24:00	1505.79	1431.62	1714.09	1495.17	1791.43	1296.02	1590.75	1520.42	1495.29	1260.44	1470.47	1566.98			4	1.01674	1.01568	1.01762	1.0078	0.998098	1.01943	1.00699	1.03608	1.04345	1.02196	1.02134	1.03152
00:25:00	1505.63	1431.52	1717.27	1521.61	1812.91	1304.04	1617.46	1525.16	1499.48	1265.19	1472.43	1573.18			5	1.01663	1.01561	1.01558	1.00952	1.0033	1.01678	1.01455	1.03105	1.03397	1.01501	1.01391	1.0308
00:26:00	1503.04	1427.23	1704.75	1519.1	1819.7	1299.37	1600.64	1521.28	1485.85	1256.6	1466.21	1566			6	1.01488	1.01256	1.01595	0.989876	1.00033	1.01666	1.02433	1.0231	1.03245	1.01961	1.00462	1.01268
00:27:00	1501.19	1427.84	1701.35	1521.7	1829.19	1296	1612.66	1513.89	1483.67	1262.29	1469	1568.18			7	1.01364	1.013	1.0107	0.990724	0.993088	1.01883	1.02555	1.02215	1.0225	1.01031	1.00909	1.01153
00:28:00	1484.35	1413.26	1701.96	1492.08	1823.77	1295.84	1628.19	1502.22	1469.38	1250.77	1458.31	1567.08			8	1.00226	1.00265	1.00759	1.01337	1.0041	1.01334	1.02571	1.02914	1.0197	1.00644	0.997793	0.996099
00:29:00	1479.8	1406.32	1693.16	1493.36	1810.57	1298.61	1630.13	1500.83	1465.35	1245.99	1444.95	1539.53			9	0.999195	0.997723	0.997159	1.00451	0.990261	1.00196	1.01187	1.00153	1.0177	1.00842	0.998218	0.995885
00:30:00	1480.99	1409.53	1687.95	1527.49	1830.64	1291.6	1630.39	1511.09	1462.47	1248.44	1451.38	1537.78			10	1	1	1	1	1	1	1	1	1	1	1	1
00:31:00	1487.54	1433.08	1670.48	1514.15	1805.42	1277.1	1608.39	1470.55	1437.04	1238.01	1435.14	1514.33			11	1.00442	1.01671	0.995056	1.05445	0.839394	0.996207	0.997712	1.01294	1.01887	1.03714	1.04868	1.02264
00:32:00	1396.51	1388.04	1675.24	1507.34	1823.17	1274.6	1589.52	1468.31	1464.16	1283.99	1435.75	1514			12	0.942953	0.984754	0.999077	1.03402	0.811791	0.991247	0.973004	1.00577	1.00556	1.02941	1.04574	0.994301
00:33:00	1359.6	1368.57	1666.96	1589.42	1530.36	1269.77	1585.89	1487.31	1445.03	1274.42	1438.31	1520.26			13	0.918029	0.970946	0.989311	1.02603	0.79918	0.987231	0.981917	0.975608	0.988509	1.02655	1.01006	0.979927
00:34:00	1344.68	1344.76	1673.69	1558.62	1480.03	1263.45	1546.61	1476.79	1420.53	1270.88	1508.33	1554.67			14	0.90796	0.954055	0.989147	1.02106	0.771054	0.986069	0.969746	0.954501	0.974002	1.00758	0.996847	0.966096
00:35:00	1285.39	1320.25	1657.33	1546.58	1457.04	1258.33	1560.78	1432.49	1399.68	1247.39	1504.1	1511.59			15	0.867925	0.93666	0.989717	1.01574	0.75976	0.985684	0.95067	0.94184	0.949283	0.991183	0.991015	0.955794
00:36:00	1251.98	1311.2	1657.06	1539.08	1405.76	1256.85	1541.43	1401.5	1364.16	1227.1	1452.78	1489.74			16	0.845365	0.930245	0.989227	0.990997	0.755621	0.99031	0.944589	0.920547	0.937581	0.986599	0.966338	0.945828
00:37:00	1229.21	1287.45	1658.02	1531.07	1385.17	1256.36	1511.11	1382.91	1347.34	1221.42	1433.78	1468.71			17	0.829988	0.913391	0.981532	0.998946	0.745787	0.987418	0.944047	0.92466	0.931962	0.976214	0.950176	0.935784
00:38:00	1203.9	1277.06	1657.19	1493.77	1377.63	1262.25	1501.45	1351.65	1339.27	1208.56	1425.39	1453.05			18	0.812903	0.906024	0.979019	0.995894	0.728897	0.99008	0.940488	0.90482	0.912704	0.965875	0.937228	0.925707
00:39:00	1182.69	1263.59	1644.3	1505.76	1359.7	1258.57	1500.59	1357.69	1311.59	1195.76	1389.89	1437.9			19	0.798579	0.896464	0.976096	0.987388	0.723367	0.98329	0.936002	0.897571	0.90242	0.953164	0.927189	0.899136
00:40:00	1162.38	1248.75	1640.09	1501.15	1328.9	1261.96	1494.93	1328.56	1296.81	1180.03	1366.65	1422.63			20	0.784865	0.885934	0.973186	0.966426	0.691208	0.983608	0.932216	0.878169	0.889759	0.949459	0.91563	0.901496
00:41:00	1134.48	1237.37	1635.2	1488.33	1318.82	1253.31	1487.8	1317.91	1278.62	1175.44	1348.03	1407.31			21	0.766027	0.877864	0.978962	1.01464	0.680085	0.985989	0.933766	0.882137	0.877827	0.927169	0.90389	0.894892
00:42:00	1114.9	1218.69	1630.32	1456.74	1260.19	1253.71	1481.78	1289.42	1261.47	1147.85	1333.59	1366.92			22	0.752807	0.864613	0.969946	1.00321	0.666846	0.982352	0.931567	0.861626	0.874214	0.927304	0.888203	0.879842
00:43:00	1113.06	1214.28	1640	1529.42	1239.91	1256.74	1484.24	1295.25	1256.28	1148.01	1316.96	1370.5			23	0.751564	0.861481	0.960019	0.985506	0.6521	0.977431	0.927873	0.85038	0.864428	0.92111	0.880543	0.868063
00:44:00	1091.03	1200.63	1624.89	1512.18	1215.77	1252.11	1480.75	1265.13	1242.22	1140.34	1300.08	1360.46			24	0.736686	0.851799	0.956486	0.983259	0.642283	0.970158	0.910641	0.842573	0.853473	0.897069	0.876501	0.867041
00:45:00	1068.32	1184.17	1608.26	1485.5	1188.89	1245.84	1474.88	1248.62	1226.47	1110.58	1277.51	1337.58			25	0.721353	0.840119	0.962644	0.981379	0.638361	0.976452	0.914542	0.834664	0.840526	0.890353	0.864302	0.865222
00:46:00	1046.6	1166.21	1602.35	1482.11	1170.99	1236.57	1447.49	1237.16	1207.87	1102.27	1266.49	1319.68			26	0.706685	0.827381	0.962774	0.978286	0.633677	0.975636	0.913042	0.829887	0.839841	0.892543	0.863356	0.858809
00:47:00	1042.86	1162.52	1612.66	1479.28	1163.84	1244.59	1453.69	1225.55	1206.89	1104.98	1260.68	1318.12			27	0.704159	0.824763	0.966947	0.976421	0.62344	0.977111	0.906023	0.823785	0.834036	0.883961	0.848426	0.849963
00:48:00	1024.72	1158.21	1612.88	1474.61	1155.3	1243.55	1451.3	1218.53	1198.54	1094.35	1243.13	1315.36			28	0.691915	0.821702	0.961161	0.970216	0.616238	0.975849	0.902216	0.829468	0.828541	0.877659	0.846788	0.850557
00:49:00	1020.08	1152.79	1619.87	1471.8	1136.64	1245.43	1440.15	1209.57	1190.65	1086.55	1241.78	1305.61			29	0.688779	0.817856	0.966196	0.975629	0.611842	0.976782	0.899363	0.809753	0.820762	0.871348	0.838759	0.833632
00:50:00	1001.9	1134.29	1610.18	1462.45	1123.51	1243.82	1434.09	1217.92	1179.47	1078.74	1220.3	1292.16			30	0.676506	0.804734	0.955028	0.959535	0.601055	0.974177	0.893315	0.812097	0.815648	0.865299	0.825039	0.818902
00:51:00	997.28	1133.9	1618.61	1470.61	1115.49	1245.01	1429.56	1188.97	1172.12	1071.25	1217.94	1293.06			31	0.673386	0.804459	0.954201	0.956241	0.595042	0.966029	0.888759	0.789065	0.805935	0.857124	0.815363	0.815516
00:52:00	985.202	1119.55	1599.9	1446.35	1095.83	1241.69	1419.94	1192.41	1158.16	1061.13	1206.4	1267.33			32	0.66523	0.794272	0.940465	0.953368	0.5906	0.965982	0.885038	0.777959	0.797562	0.850025	0.815316	0.814252
00:53:00	973.866	1105.63	1598.52	1441.38	1084.86	1231.31	1412.7	1158.59	1146.13	1052.34	1186.66	1244.94			33	0.657576	0.784398	0.948611	0.953428	0.587565	0.970043	0.885806	0.77441	0.786142	0.840959	0.809565	0.800172
00:54:00	957.775	1092.08	1575.51	1437.05	1076.76	1231.24	1406.79	1142.28	1129.72	1041.12	1172.75	1239.79			34	0.646711	0.774786	0.948717	0.950772	0.577934	0.971715	0.88095	0.772747	0.787952	0.838609	0.80615	0.797354
00:55:00	954.375	1089.12	1589.15	1437.14	1071.23	1236.42	1408.01	1137.07	1132.32	1038.21	1172.68	1237.87			35	0.644415	0.772683	0.948905	0.968676	0.588381	0.97151	0.879818	0.770618	0.780991	0.829831	0.791338	0.780708
00:56:00	947.643	1081	1589.33	1433.14	1053.67	1238.55	1400.29	1134.63	1122.32	1027.34	1164.41	1216.47			36	0.63987	0.766923	0.93771	0.929711	0.569934	0.959025	0.866513	0.750604	0.774694	0.827687	0.790376	0.779992
00:57:00	940.137	1076.76	1589.64	1460.13	1072.72	1238.29	1398.49	1131.51	1113.27	1024.68	1159.49	1212.18			37	0.634801	0.763915	0.94349	0.937538	0.566408	0.957611	0.870615	0.752679	0.762291	0.813345	0.786117	0.771719
00:58:00	924.586	1054.31	1570.89	1401.39	1039.09	1222.38	1377.34	1102.12	1095.44	1006.93	1138.19	1186.88			38	0.624301	0.74799	0.937064	0.941724	0.563447	0.962396	0.873772	0.743704	0.765866	0.815189	0.775088	0.767997
00:59:00	917.512	1055.53	1580.57	1413.19	1032.66	1220.58	1383.86	1105.17	1100.58	1009.21	1136.81	1185.79			39	0.619524	0.748853	0.932668	0.933368	0.555691	0.958968	0.86258	0.732198	0.756853	0.807565	0.77598	0.756565
01:00:00	916.417	1048.57	1569.81	1419.5	1027.26	1226.67	1388.88	1091.99	1087.63	999.773	1130.68	1173.21			40	0.618785	0.743914	0.932971	0.932812	0.552904	0.961674	0.861196	0.730987	0.751731	0.797361	0.767683	0.749262
01:01:00	904.847	1043.42	1562.44	1406.91	1013.12	1222.31	1371.09	1075.09	1080.27	987.141	1114.82	1167.55			41	0.610973	0.740261	0.934155	0.926905	0.550905	0.965647	0.858856	0.727886	0.747134	0.799608	0.761757	0.741806
01:02:00	893.559	1033.52	1562.95	1406.07	1008.04	1225.75	1368.89	1073.32	1073.66	989.923	1116.1	1150.17			42	0.603351	0.73324	0.926021	0.916555	0.542383	0.959736	0.85399	0.718036	0.742316	0.793166	0.754319	0.730421
01:03:00	890.51	1028.61	1564.93	1397.16	1004.39	1230.82	1365.17	1068.76	1066.74	981.947	1104.17	1139.07			43	0.601292	0.729755	0.929078	0.916266	0.541299	0.960301	0.850734	0.711333	0.735941	0.785966	0.752082	0.726037
01:04:00	880.323	1015.15	1551.31	1381.56	988.857	1223.28	1357.44	1054.3	1057.58	973.034	1095.64	1127.73			44	0.594414	0.720209	0.923494	0.914507	0.536216	0.962851	0.848311	0.705126	0.730857	0.784733	0.744848	0.714321
01:05:00	874.611	1013.6	1556.43	1381.13	986.88	1224	1352.26	1044.46	1050.27	971.507	1084.94	1110.43			45	0.590557	0.71911	0.921281	0.907253	0.535238	0.960549	0.841959	0.690279	0.72716	0.779075	0.740706	0.712848
01:06:00	871.34	1008	1547.08	1378.48	977.613	1227.25	1348.41	1035.34	1044.96	964.503	1081.73	1103.76			46	0.588348	0.715135	0.918953	0.90844	0.529923	0.963411	0.842613	0.689875	0.720877	0.773171	0.738478	0.708856
01:07:00	858.308	997.546	1543.37	1367.54	975.831	1224.32	1338.31	1013.54	1035.93	957.193	1071.32	1085.95			47	0.579549	0.707718	0.924724	0.909463	0.529354	0.965157	0.83973	0.693327	0.718944	0.769799	0.730754	0.702681
01:08:00	855.528	996.857	1539.47	1369.33	966.141	1227.97	1339.35	1012.95	1033.15	953.019	1065.37	1083.71			48	0.577671	0.707229	0.915753	0.910523	0.529029	0.960617	0.836293	0.681001	0.714833	0.765537	0.72525	0.695539
01:09:00	855.676	990.408	1549.13	1370.87	965.103	1230.19	1334.77	1018.02	1027.24	947.742	1062.16	1077.64			49	0.577771	0.702654	0.915018	0.894935	0.519121	0.962344	0.830449	0.675222	0.708722	0.759827	0.726652	0.694516
01:10:00	845.499	982.309	1534.11	1372.47	964.511	1224.41	1329.31	999.92	1018.46	940.673	1051.05	1068.25			50	0.5709	0.696908	0.918582	0.892592	0.516429	0.947807	0.832068	0.671119	0.70382	0.754316	0.721311	0.687904
01:11:00	837.994	969.699	1532.88	1348.97	946.447	1226.61	1320.02	991.435	1011.42	933.851	1043.13	1057.4			51	0.565832	0.687962	0.914581	0.889748	0.512097	0.946719	0.829744	0.663471	0.703038	0.750773	0.714257	0.687081
01:12:00	830.556	964.334	1538.85	1345.44	941.538	1208.08	1322.59	985.41	1010.29	929.465	1045.15	1055.84			52	0.56081	0.684155	0.914824	0.885839	0.511246	0.953024	0.824485	0.660638	0.698154	0.744797	0.712767	0.683659
01:13:00	831.731	961.451	1532.14	1341.16	933.641	1206.69	1318.9	974.181	1003.28	922.066	1037.47	1045.79			53	0.561603	0.68211	0.914083	0.88635	0.509347	0.951157	0.825299	0.656449	0.692229	0.742797	0.710098	0.676128
01:14:00	827.907	957.195	1532.55	1335.26	932.088	1214.73	1310.54	970.02	994.762	919.59	1027.32	1044.54			54	0.559021	0.67909	0.913865	0.883149	0.508527	0.952821	0.817359	0.651827	0.692469	0.741376	0.703211	0.672165
01:15:00	822.166	952.971	1531.31	1336.04	928.627	1212.35	1311.83	963.87	995.106	917.831	1025.18	1039.34			55	0.555145	0.676094	0.912759	0.882523	0.504287	0.948098	0.819333	0.649274	0.687687	0.740286	0.696666	0.665313
01:16:00	815.937	946.294	1530.94	1331.21	927.131	1214.47	1299.21	957.084	988.235	916.481	1021.34	1027.89			56	0.550939	0.671357	0.905839	0.875501	0.500616	0.946204	0.809881	0.63942	0.684674	0.732783	0.695318	0.66449
01:17:00	807.124	939.502	1529.09	1330.27	919.401	1208.45	1302.35	953.335	983.904	907.193	1011.44	1021.86			57	0.544988	0.666538	0.91561	0.872444	0.497949	0.945104	0.811332	0.639165	0.679701	0.726635	0.688218	0.656619
01:18:00	801.658	930.529	1517.5	1319.68	912.708	1206.04	1287.33	938.866	976.758	899.582	1002.02	1011.45			58	0.541297	0.660172	0.904271	0.871696	0.497787	0.944992	0.803749	0.632808	0.679029	0.729511	0.68642	0.656283
01:19:00	802.338	925.985	1533.87	1315.07	907.846	1204.63	1289.63	938.492	975.792	903.142	1000.08	1010.19			59	0.541756	0.656948	0.911434	0.868226	0.493541	0.942199	0.809757	0.63303	0.667657	0.720765	0.685106	0.65502
01:20:00	793.081	919.502	1514.87	1313.94	907.55	1204.49	1277.58	929.158	959.45	892.314	989.872	998.229			60	0.535506	0.652349	0.9138	0.873257	0.496601	0.945145	0.80119	0.632275	0.669325	0.716235	0.679565	0.647764
01:21:00	792.967	919.213	1526.87	1308.71	899.809	1200.93	1287.13	929.483	961.848	886.706	987.286	997.718			61	0.535429	0.652144	0.904408	0.865641	0.488703	0.934946	0.799671	0.621431	0.67045	0.717065	0.678066	0.647819
01:22:00	792.375	918.129	1530.84	1316.3	905.389	1204.68	1273.51	928.375	963.464	887.734	985.395	995.798			62	0.535029	0.651375	0.911783	0.876507	0.499303	0.936514	0.79775	0.62385	0.662209	0.707047	0.673664	0.63887
01:23:00	782.243	905.624	1515.1	1304.82	890.99	1191.69	1271.1	912.453	951.622	875.331	977.426	984.767			63	0.528188	0.642503	0.903631	0.860308	0.494142	0.933754	0.799651	0.614766	0.662902	0.708577	0.667794	0.637811
01:24:00	781.172	909.33	1527.46	1321.2	910.315	1193.68	1268.04	916.004	952.617	877.225	975.27	984.85			64	0.527465	0.645132	0.900851	0.855346	0.482049	0.928	0.787636	0.610792	0.655038	0.699834	0.665398	0.632441
01:25:00	776.177	897.117	1513.8	1296.78	900.905	1190.17	1271.06	902.666	941.317	866.401	968.939	971.245			65	0.524092	0.636468	0.902462	0.851863	0.483304	0.927789	0.788579	0.608555	0.650678	0.698334	0.665545	0.634552
01:26:00	770.924	894.077	1509.14	1289.3	878.858	1182.83	1251.97	896.831	935.051	864.545	960.496	969.636			66	0.520545	0.634311	0.906168	0.854358	0.487686	0.929442	0.787982	0.606782	0.649115	0.696192	0.654377	0.622043
01:27:00	771.595	889.995	1511.84	1284.05	881.146	1182.56	1253.46	893.547	932.805	861.893	957.049	961.471			67	0.520998	0.631415	0.897588	0.843537	0.474042	0.918251	0.780993	0.597538	0.649341	0.694701	0.654174	0.621509
01:28:00	768.766	888.949	1518.05	1287.81	889.135	1184.67	1252.52	890.944	933.13	860.047	957.26	964.681			68	0.519088	0.630673	0.898918	0.844743	0.473789	0.912856	0.777708	0.599112	0.637852	0.685671	0.650841	0.619918
01:29:00	758.159	876.652	1503.68	1271.5	864.259	1170.41	1241.41	877.37	916.62	848.867	941.197	945.664			69	0.511926	0.621949	0.903225	0.836956	0.479581	0.9182	0.780955	0.595737	0.632827	0.683031	0.651084	0.619457
01:30:00	756.713	872.695	1505.9	1273.32	863.798	1163.53	1236.19	879.681	909.399	845.599	940.906	944.852			70	0.510949	0.619141	0.901353	0.842495	0.481793	0.918528	0.780745	0.595879	0.636402	0.679419	0.645562	0.612116
01:31:00	754.171	873.226	1513.12	1261.58	874.359	1170.34	1241.35	874.726	914.536	841.127	936.112	942.433			71	0.509233	0.619518	0.897257	0.835176	0.468202	0.912662	0.771105	0.590061	0.637191	0.67984	0.643704	0.608731
01:32:00	752.574	871.119	1509.98	1269.93	878.391	1170.76	1241.01	874.934	915.669	841.649	936.461	941.732			72	0.508155	0.618023	0.898431	0.828053	0.469284	0.910967	0.770969	0.584952	0.628112	0.673762	0.639223	0.604648
01:33:00	745.435	864.667	1503.12	1258.9	853.613	1163.28	1225.69	866.392	902.623	834.124	928.519	930.572			73	0.503334	0.613446	0.89718	0.827852	0.466243	0.912586	0.766582	0.584175	0.62444	0.671683	0.638827	0.605462
01:34:00	742.34	862.423	1505.09	1248.16	855.585	1161.12	1225.47	858.89	897.346	831.55	925.846	925.426			74	0.501244	0.611854	0.898994	0.827271	0.464959	0.912749	0.765532	0.579878	0.623847	0.668171	0.635098	0.600059
01:35:00	741.025	854.063	1502.99	1247.86	850.041	1163.19	1218.5	857.749	896.493	827.202	919.402	919.219			75	0.500357	0.605923	0.897183	0.820864	0.462881	0.911513	0.760633	0.57886	0.620641	0.66838	0.626591	0.596485
01:36:00	738.194	852.337	1506.03	1246.98	847.7	1163.39	1216.83	851.44	891.886	827.461	918.832	920.456			76	0.498445	0.604698	0.888832	0.816004	0.459472	0.904358	0.759481	0.576155	0.619043	0.663342	0.630722	0.59594
01:37:00	734.366	846.328	1503	1237.32	843.911	1161.82	1209.04	849.946	889.59	821.224	913.469	912.242			77	0.49586	0.600435	0.894887	0.816612	0.462127	0.908763	0.75851	0.576189	0.612779	0.658357	0.622567	0.588835
01:38:00	733.172	837.814	1489.01	1230	837.696	1152.7	1207.21	845.973	880.588	815.053	901.233	906.81			78	0.495054	0.594395	0.888584	0.810083	0.454678	0.904631	0.748921	0.56911	0.613575	0.65826	0.619744	0.588461
01:39:00	733.297	846.198	1499.15	1230.91	842.536	1158.31	1205.67	846.024	881.732	814.933	907.174	905.981			79	0.495138	0.600343	0.888387	0.805426	0.4539	0.905987	0.746625	0.566196	0.607108	0.651597	0.616979	0.585579
01:40:00	723.148	834.377	1488.59	1221.07	828.955	1153.05	1190.43	835.629	872.439	806.684	895.445	895.18			80	0.488286	0.591956	0.886754	0.807673	0.452458	0.901184	0.749071	0.561776	0.603081	0.645223	0.6115	0.581637
01:41:00	721.649	825.278	1488.26	1214.05	827.537	1154.78	1186.78	831.351	866.652	798.793	891.385	894.611			81	0.487273	0.585501	0.886472	0.798373	0.447508	0.899178	0.743513	0.560185	0.600828	0.645081	0.608444	0.576562
01:42:00	716.984	825.094	1485.53	1217.44	824.909	1148.65	1190.67	824.861	863.415	798.617	887.407	890.229			82	0.484124	0.58537	0.884701	0.797564	0.448374	0.902913	0.739962	0.556473	0.597913	0.642994	0.61056	0.579601
01:43:00	710.846	822.196	1485.06	1203.42	815.884	1146.1	1181.83	822.524	859.225	796.033	879.527	884.236			83	0.479979	0.583314	0.891334	0.799786	0.448663	0.905921	0.746376	0.559095	0.595952	0.636975	0.605893	0.573539
01:44:00	713.565	814.362	1482.09	1202.2	817.463	1150.86	1176.19	817.075	856.408	788.582	875.132	876.521			84	0.481815	0.577756	0.883789	0.79168	0.446196	0.900824	0.738424	0.554538	0.599109	0.640122	0.607335	0.574707
01:45:00	717.096	819.449	1493.2	1205.55	817.99	1154.69	1186.38	820.924	860.944	792.478	878.175	881.142			85	0.484199	0.581365	0.888982	0.795966	0.443577	0.905397	0.737422	0.552115	0.592843	0.632967	0.60235	0.567903
01:46:00	706.264	808.502	1480.56	1193.33	813.492	1148.19	1173.74	814.233	851.94	783.62	871.462	871.926			86	0.476885	0.573599	0.891517	0.790113	0.44545	0.902021	0.734205	0.551489	0.594064	0.634233	0.604034	0.5683
01:47:00	706.071	809.391	1489.26	1199.79	808.716	1154.02	1172.15	810.675	853.694	785.187	873.536	873.701			87	0.476755	0.57423	0.886354	0.787857	0.441993	0.902572	0.734339	0.550112	0.588427	0.631137	0.597606	0.563868
01:48:00	702.803	805.799	1493.51	1190.97	812.132	1149.72	1167.04	809.756	845.594	781.354	866.367	863.357			88	0.474548	0.571681	0.884074	0.784153	0.441944	0.9037	0.732741	0.544492	0.587912	0.631751	0.595669	0.563814
01:49:00	704.026	805.777	1484.86	1187.57	805.829	1150.42	1167.25	807.734	844.853	782.114	868.789	863.961			89	0.475374	0.571666	0.884432	0.782283	0.439599	0.903267	0.728652	0.543942	0.585652	0.623648	0.591925	0.5563
01:50:00	699.433	797.909	1481.04	1181.99	805.74	1151.86	1164.71	799.483	841.606	772.083	859.544	857.223			90	0.472273	0.566084	0.877938	0.77867	0.433616	0.899145	0.723154	0.536204	0.583762	0.626266	0.588341	0.557932
01:51:00	698.772	798.795	1481.64	1179.17	801.465	1151.31	1158.21	798.675	838.89	775.324	856.757	857.141			91	0.471826	0.566712	0.882782	0.773713	0.43565	0.899721	0.725705	0.539369	0.578167	0.616249	0.59194	0.55499
01:52:00	693.627	792.121	1470.76	1173.72	790.556	1146.05	1149.47	787.313	830.849	762.922	851.372	845.718			92	0.468352	0.561977	0.88411	0.776621	0.434026	0.90351	0.723181	0.537437	0.576464	0.615833	0.579968	0.547203
01:53:00	687.574	786.47	1478.87	1166.25	794.264	1146.79	1153.53	791.961	828.402	762.407	846.218	848.199			93	0.464265	0.557968	0.874779	0.766909	0.431395	0.891172	0.714089	0.530604	0.578478	0.61944	0.585193	0.551744
01:54:00	691.542	790.465	1481.1	1170.63	791.304	1151.62	1149.51	789.124	831.297	766.873	851.394	843.727			94	0.466944	0.560802	0.885006	0.774913	0.431412	0.903863	0.718412	0.533967	0.567814	0.610841	0.582909	0.549245
01:55:00	684.151	776.092	1465.46	1155.99	786.507	1135.89	1135.06	779.091	815.972	756.227	834.174	831.888			95	0.461954	0.550605	0.878866	0.764972	0.428736	0.896119	0.718255	0.529398	0.572243	0.613361	0.57814	0.544315
01:56:00	690.174	783.955	1482.6	1168.06	786.538	1152.07	1141.93	784.029	822.336	759.347	841.689	838.791			96	0.466021	0.556184	0.881772	0.762773	0.427699	0.897413	0.710692	0.528451	0.56685	0.607874	0.57307	0.542039
01:57:00	682.397	775.099	1472.31	1153.08	781.659	1142.2	1141.68	777.32	814.587	752.554	838.405	834.993			97	0.46077	0.549901	0.87817	0.755747	0.424731	0.893464	0.709753	0.524224	0.5667	0.603038	0.574199	0.542996
01:58:00	679.929	769.682	1477.18	1149.76	779.768	1143.85	1129.66	775.929	814.371	746.567	831.545	827.498			98	0.459103	0.546058	0.878757	0.761182	0.427602	0.899057	0.70985	0.527276	0.563165	0.60062	0.574463	0.539022
01:59:00	677.447	770.321	1471.15	1139.17	774.357	1138.81	1128.17	769.723	809.291	743.573	824.253	824.037			99	0.457427	0.546511	0.877376	0.758396	0.426249	0.896816	0.709271	0.521643	0.56433	0.600999	0.57155	0.535706
02:00:00	678.415	770.157	1472.13	1147.36	779.591	1145.94	1128.32	774.204	810.965	744.043	825.877	825.493			100	0.458081	0.546395	0.876758	0.752171	0.421793	0.896148	0.703175	0.521291	0.561008	0.598133	0.00155947	0.00156355
02:01:00	673.512	764.693	1469.82	1143.16	777.124	1143.09	1127.4	765.933	806.192	740.495	826.256	819.451			101	0.45477	0.542518	0.0010297	0.000989821	0.00086717	0.00167032	0.00115695	0.00145814	0.556937	0.596015	0.00172494	0.00154053
02:02:00	671.435	760.916	1468.78	1133.78	769.001	1142.23	1117.71	765.417	800.342	737.872	822.066	814.41			102	0.453368	0.539839	0.00108701	0.00127443	0.000888013	0.00180997	0.00125509	0.00151535	0.00178909	0.00149272	0.611359	0.574252
02:03:00	1.571	1.68	1.725	1.492	1.581	2.129	1.839	2.141	2.571	1.848	2.243	2.377			103	0.00106077	0.00119189	0.938247	0.722769	0.420187	0.979051	0.639915	0.542	0.00173481	0.00171889	0.607741	0.570925
02:04:00	1.695	1.8	1.821	1.921	1.619	2.307	1.995	2.225	2.493	2.128	2.481	2.342			104	0.0011445	0.00127703	0.948164	0.692588	0.415155	0.982116	0.622654	0.537841	0.547259	0.622803	0.600512	0.565392
02:05:00	705.427	756.327	1571.79	1089.46	766.073	1247.9	1017.16	795.824	786.433	771.036	879.325	873.009			105	0.47632	0.536583	0.940576	0.659091	0.408611	0.983178	0.59949	0.531093	0.538166	0.618266	0.597005	0.560204
02:06:00	708.951	744.914	1588.4	1043.97	756.899	1251.81	989.723	789.717	773.367	765.42	874.12	867.951			106	0.478699	0.528486	0.943401	0.639237	0.403412	0.982523	0.588469	0.52903	0.526801	0.61141	0.589343	0.551239
02:07:00	700.032	729.174	1575.69	993.477	744.968	1253.16	952.903	779.809	757.035	756.932	863.723	859.54			107	0.472677	0.517319	0.934875	0.612698	0.398497	0.975964	0.569659	0.520687	0.517149	0.605687	0.584485	0.551896
02:08:00	693.609	724.732	1580.42	963.55	735.489	1252.33	935.386	776.779	743.165	749.846	858.679	851.653			108	0.46834	0.514168	0.942962	0.599277	0.400204	0.981258	0.56178	0.519653	0.50296	0.59588	0.579149	0.544455
02:09:00	683.904	707.829	1566.14	923.547	726.529	1243.97	905.487	764.53	722.774	737.705	847.658	838.024			109	0.461787	0.502176	0.933855	0.581181	0.392603	0.970346	0.55107	0.511729	0.496196	0.592271	0.562782	0.533307
02:10:00	685.433	696.842	1579.69	903.316	729.64	1250.72	892.963	763.011	713.054	733.237	840.671	839.023			110	0.46282	0.494381	0.928521	0.565753	0.394	0.965729	0.535826	0.50492	0.483702	0.580987	0.562371	0.532436
02:11:00	677.076	684.405	1564.43	876.039	715.783	1236.81	875.939	751.377	695.099	719.268	832.997	827.711			111	0.457177	0.485557	0.932277	0.556054	0.390829	0.976095	0.532792	0.503481	0.468076	0.562834	0.557117	0.529241
02:12:00	672.468	664.078	1555.5	852.784	718.329	1230.92	851.709	741.378	672.645	696.794	809.456	810.763			112	0.454065	0.471136	0.924471	0.546861	0.388315	0.969608	0.523213	0.496133	0.469058	0.56552	0.549981	0.522686
02:13:00	672.517	662.138	1561.79	838.165	712.548	1244.13	846.885	739.265	674.056	700.12	808.865	809.439			113	0.454098	0.46976	0.924595	0.535809	0.38419	0.957126	0.514468	0.493425	0.458691	0.550172	0.544298	0.520048
02:14:00	665.794	642.845	1548.71	824.307	707.964	1235.87	831.659	728.477	659.158	681.119	801.307	804.582			114	0.449559	0.456072	0.915068	0.524179	0.380818	0.957622	0.505367	0.489039	0.442269	0.53781	0.535868	0.510702
02:15:00	660.58	629.198	1548.92	807.649	700.444	1219.96	817.76	724.5	635.559	665.814	791.044	794.616			115	0.446038	0.44639	0.915515	0.521258	0.378679	0.958571	0.499643	0.484757	0.436011	0.529911	0.539755	0.513805
02:16:00	656.23	619.44	1532.96	790.118	694.296	1220.59	803.293	718.06	626.566	656.035	782.87	790.606			116	0.443101	0.439467	0.92323	0.516343	0.381715	0.965445	0.497769	0.482813	0.423547	0.518081	0.530339	0.506075
02:17:00	649.164	605.176	1533.71	785.715	690.397	1221.8	794.195	711.773	608.655	641.389	770.745	776.398			117	0.43833	0.429347	0.918584	0.505694	0.377726	0.959542	0.487431	0.477526	0.421584	0.510791	0.52255	0.500888
02:18:00	655.295	600.573	1546.63	778.307	695.931	1230.56	791.215	708.919	605.834	632.364	776.336	781.114			118	0.44247	0.426082	0.91456	0.495905	0.373511	0.957297	0.477968	0.475762	0.413894	0.496141	0.517782	0.497001
02:19:00	648.856	591.931	1538.85	762.255	688.66	1223.04	774.784	701.155	594.782	614.228	762.793	769.363			119	0.438122	0.419951	0.912229	0.489356	0.372531	0.954247	0.475688	0.471035	0.403728	0.485746	0.512203	0.493458
02:20:00	645.161	578.633	1532.11	747.5	680.975	1220.17	759.742	698.566	580.173	601.359	751.59	761.478			120	0.435627	0.410516	0.906169	0.486535	0.370433	0.949435	0.468547	0.467259	0.397223	0.469869	0.508752	0.490637
02:21:00	642.119	571.162	1528.2	737.628	679.187	1216.29	756.118	691.625	570.826	581.703	744.732	755.569			121	0.433573	0.405216	0.909757	0.479015	0.369162	0.948991	0.462456	0.467162	0.391402	0.460219	0.499573	0.480437
02:22:00	637.843	566.334	1518.05	733.376	675.363	1210.15	744.766	686.081	562.461	569.756	736.707	750.182			122	0.430686	0.401791	0.905735	0.47067	0.366164	0.950509	0.455995	0.462222	0.389899	0.454966	0.486608	0.475218
02:23:00	635.547	559.808	1524.06	722.041	673.045	1209.59	735.085	685.938	560.301	563.253	731.744	745.894			123	0.429135	0.397161	0.901797	0.46759	0.36736	0.94585	0.447155	0.456611	0.381531	0.439775	0.482579	0.471818
02:24:00	630.467	551.576	1517.33	709.461	667.579	1211.52	724.815	678.684	548.276	544.446	718.541	730.386			124	0.425705	0.39132	0.904964	0.463533	0.367693	0.946873	0.443805	0.457101	0.378622	0.432492	0.47674	0.469859
02:25:00	625.538	546.968	1510.73	704.819	669.76	1205.58	710.763	670.446	544.096	535.43	699.893	722.453			125	0.422377	0.388051	0.908811	0.463009	0.365434	0.948384	0.440684	0.455615	0.378343	0.42791	0.465231	0.458499
02:26:00	627.176	545.728	1516.03	698.703	670.367	1206.89	705.439	671.166	543.695	529.757	694.099	717.283			126	0.423483	0.387172	0.901291	0.454536	0.363761	0.943852	0.430344	0.44849	0.374975	0.421465	0.456412	0.453339
02:27:00	622.041	538.878	1522.48	697.914	666.248	1208.81	700.478	668.984	538.854	521.778	685.701	714.305			127	0.420016	0.382312	0.902597	0.453953	0.361779	0.944658	0.42993	0.445532	0.370281	0.412998	0.447492	0.448111
02:28:00	623.498	537.209	1509.88	685.142	663.199	1203.04	684.042	658.522	532.109	511.296	669.147	697.036			128	0.421	0.381128	0.900401	0.444179	0.361268	0.940149	0.422392	0.441707	0.368939	0.409133	0.439882	0.438274
02:29:00	618.807	536.517	1512.07	684.264	659.585	1204.07	683.384	654.179	530.18	506.511	656.463	689.191			129	0.417832	0.380637	0.893504	0.441613	0.360588	0.936296	0.418996	0.434249	0.364715	0.400514	0.434133	0.431657
02:30:00	615.889	528.612	1508.39	669.531	658.654	1198.32	671.402	648.563	524.11	495.84	643.632	681.243			130	0.415862	0.375028	0.892774	0.437676	0.357525	0.936181	0.412392	0.43415	0.364551	0.394131	0.428047	0.427943
02:31:00	608.674	525.727	1496.83	665.663	657.413	1193.41	666.004	637.611	523.875	487.938	632.687	666.288			131	0.41099	0.372982	0.893954	0.438087	0.358072	0.935415	0.410462	0.431285	0.361125	0.391267	0.420035	0.419555
02:32:00	606.742	522.69	1495.61	659.729	651.829	1193.26	655.507	637.467	518.952	484.393	624.418	656.229			132	0.409686	0.370827	0.893627	0.434109	0.355817	0.936377	0.405144	0.428485	0.361288	0.389067	0.417574	0.417574
02:33:00	603.167	521.37	1497.59	660.348	652.827	1192.28	652.439	633.259	519.186	481.669	615.664	650.583			133	0.407272	0.369891	0.894042	0.431712	0.358997	0.938531	0.400607	0.425359	0.360496	0.384494	0.409752	0.409877
02:34:00	602.952	519.861	1497.04	654.351	648.715	1193.51	643.986	629.149	518.047	476.007	604.141	637.831			134	0.407127	0.36882	0.898659	0.430582	0.358403	0.937554	0.402079	0.423113	0.357485	0.382077	0.406189	0.404396
02:35:00	600.905	519.413	1497.74	650.738	654.513	1196.26	636.775	624.558	513.72	473.015	600.601	634.819			135	0.405744	0.368502	0.892765	0.427299	0.356032	0.936476	0.397937	0.418906	0.358225	0.378578	0.400442	0.399057
02:36:00	595.575	518.718	1505.47	649.035	653.43	1195.01	639.114	621.261	514.784	468.683	589.351	623.117			136	0.402145	0.368009	0.88878	0.426158	0.354204	0.936452	0.395171	0.414793	0.355334	0.37802	0.393879	0.395894
02:37:00	595.867	516.436	1495.6	644.087	649.108	1193.64	632.53	615.083	510.629	467.992	584.226	614.785			137	0.402343	0.36639	0.890384	0.424437	0.355298	0.933171	0.39306	0.410726	0.354643	0.375196	0.391749	0.390617
02:38:00	584.914	516.601	1488.92	642.366	645.775	1193.61	628.133	609.044	509.636	464.496	575.96	606.668			138	0.394947	0.366507	0.886949	0.422952	0.354498	0.934169	0.389342	0.409695	0.354718	0.37014	0.391231	0.387667
02:39:00	581.868	513.966	1491.61	639.773	647.769	1189.42	624.778	603.072	509.745	458.237	566.521	601.86			139	0.39289	0.364638	0.891878	0.423028	0.356267	0.931265	0.391037	0.409235	0.353984	0.368809	0.385279	0.383156
02:40:00	581.676	515.706	1485.85	637.534	646.311	1190.7	618.868	601.559	508.689	456.589	563.457	593.837			140	0.392761	0.365872	0.883887	0.418677	0.352599	0.930299	0.385122	0.40218	0.353362	0.369969	0.380406	0.377157
02:41:00	579.906	516.71	1494.11	637.648	649.535	1186.99	621.562	600.883	507.795	458.025	562.712	589.353			141	0.391565	0.366584	0.88504	0.419861	0.350128	0.925194	0.386011	0.399714	0.34947	0.364588	0.377415	0.374972
02:42:00	574.936	513.169	1480.72	631.09	642.848	1185.76	612.16	590.525	502.203	451.364	554.151	582.495			142	0.38821	0.364072	0.877729	0.413288	0.351502	0.926665	0.381992	0.397183	0.35238	0.363753	0.373426	0.371077
02:43:00	569.675	509.254	1482.65	632.875	638.344	1179.26	613.573	586.904	506.385	450.33	547.142	573.375			143	0.384657	0.361295	0.876019	0.414206	0.350172	0.918651	0.379834	0.393017	0.350055	0.364783	0.371457	0.368091
02:44:00	566.669	512.049	1470.41	622.967	640.848	1181.13	607.186	583.188	503.043	451.605	542.84	570.053			144	0.382627	0.363278	0.877468	0.412618	0.348808	0.925081	0.379867	0.394292	0.349539	0.360624	0.371828	0.367211
02:45:00	559.995	506.638	1467.54	624.351	638.424	1170.92	603.756	577.07	502.302	446.456	537.103	564.131			145	0.378121	0.359439	0.880015	0.412861	0.349516	0.922759	0.3775	0.393173	0.348438	0.361634	0.371938	0.368833
02:46:00	562.3	509.888	1469.97	621.957	635.936	1179.11	603.808	578.943	500.72	447.707	534.271	559.592			146	0.379677	0.361745	0.881607	0.414884	0.350421	0.927618	0.379325	0.392699	0.34823	0.359472	0.366679	0.363448
02:47:00	558.313	505.707	1474.24	622.324	637.227	1176.15	600.046	577.299	500.421	445.03	534.804	558.254			147	0.376985	0.358778	0.877665	0.407939	0.347506	0.920574	0.376394	0.390495	0.350426	0.362948	0.368529	0.36454
02:48:00	559.657	512.901	1476.9	625.373	638.878	1182.35	602.946	576.604	503.576	449.333	534.963	560.72			148	0.377893	0.363882	0.88099	0.412398	0.348449	0.923139	0.376678	0.389099	0.350474	0.360239	0.365967	0.364456
02:49:00	554.49	510.731	1470.3	614.904	633.562	1173.37	598.287	573.367	503.645	445.979	527.399	552.533			149	0.374404	0.362343	0.880989	0.414812	0.351217	0.923252	0.378473	0.388377	0.350433	0.359387	0.364405	0.357729
02:50:00	555.292	511.638	1475.87	621.625	635.283	1176.64	598.739	571.318	503.586	444.925	530.06	554.193			150	0.374945	0.362986	0.877002	0.408307	0.346204	0.921767	0.377058	0.386169	0.351585	0.360151	0.361931	0.354852
02:51:00	554.184	512.207	1475.87	625.265	640.328	1176.78	601.592	570.257	505.242	445.87	526.374	554.066			151	0.374197	0.36339	0.873026	0.408207	0.345618	0.918361	0.374512	0.382825	0.349646	0.358852	0.36194	0.354692
02:52:00	548.245	507.103	1469.19	615.459	631.189	1174.89	599.343	567.016	502.456	444.262	524.128	543.84			152	0.370187	0.359769	0.874534	0.409092	0.345737	0.915623	0.373382	0.384913	0.34618	0.355136	0.362928	0.355536
02:53:00	541.397	507.685	1462.53	615.308	630.121	1170.55	595.296	562.106	497.475	439.662	520.57	539.466			153	0.365563	0.360182	0.87248	0.408529	0.34514	0.916884	0.374136	0.381702	0.347248	0.357422	0.362288	0.354387
02:54:00	546.108	507.595	1465.06	616.642	630.337	1167.06	593.5	565.171	499.01	442.492	520.583	539.223			154	0.368744	0.360118	0.877037	0.411165	0.349427	0.921607	0.376082	0.382671	0.349532	0.355986	0.358586	0.353418
02:55:00	541.137	509.354	1461.61	615.793	629.249	1168.66	594.698	560.456	502.292	440.714	522.003	540.505			175	0.365388	0.361366	0.872722	0.410639	0.345424	0.918112	0.373517	0.380967	0.351168	0.358216	0.359157	0.351973
02:56:00	538.922	512.208	1469.25	619.767	637.065	1174.68	597.791	561.879	504.643	443.475	521.083	538.759			176	0.363892	0.363391	0.870229	0.410891	0.344239	0.915126	0.373114	0.380202	0.346731	0.356317	0.361087	0.351374
02:57:00	537.833	507.373	1462.02	618.974	629.767	1170.23	593.715	559.377	498.266	441.124	515.758	537.286			177	0.363157	0.35996	0.873572	0.410337	0.345742	0.915862	0.374647	0.379454	0.347869	0.355562	0.358965	0.350489
02:58:00	538.114	505.822	1457.84	619.354	627.606	1166.42	593.074	558.254	499.902	440.189	516.579	535.089			178	0.363347	0.35886	0.871037	0.408192	0.344795	0.913834	0.371203	0.378489	0.346481	0.355574
02:59:00	536.662	509.073	1463.44	618.519	630.347	1167.36	595.511	557.156	497.908	440.204	519.356	534.178			179	0.362366	0.361166							0.34612	0.354062
03:00:00	532.842	506.625	1459.2	615.286	628.62	1164.78	590.036	555.739	497.389	438.332	516.304	532.832			180	0.359787	0.35943
~End
Original Filename: 20170503mc1_single mt_gef assay with atg8 in different concentration and without atg8 in mlvs; Date Last Saved: 03.05.2017 17:55:28
