# Supplementary material for: Molecular mechanism to target the endosomal Mon1-Ccz1 GEF complex to the pre-autophagosomal structure
Source: eLife. 2018 Feb 15;7:e31145. doi: 10.7554/eLife.31145 (PMC5841931; doi:10.7554/eLife.31145)
Supplement: Figure 5—source data 3. [file elife-31145-fig5-data3.xlsx]

## Sheet: 20170613mc1_gef assay with fast
##BLOCKS= 1
Plate:
Time	G1	G2	G3	G4	G5	G6	G7	G8	G9	G10	G11		Time	No GTP	No GEF	10 nM wt+480 nM GST-Atg8		10 nM LIR1+480 nM GST-Atg8	10 nM LIR1	10 nM wt
00:00:00	2334.52	2163.67	2163.19	2361.64	2148.39	2203.39	2393.99	2002.68	2274.28	2336.22	2518		0	1.01401	1.01832	1.01661		1.00542	1.02115	1.01003
00:01:00	2276.07	2111.7	2156.24	2371.33	2136.81	2216.72	2400.83	1998.74	2287.26	2314.15	2435.04		1	1.01217	1.01081	1.01236		1.01259	1.02134	1.01129
00:02:00	2198.4	2077.93	2099.53	2342.64	2116.85	2206	2371.2	1954.84	2234.07	2274.93	2396.29		2	1.01543	1.01579	1.01337		1.0064	1.01566	1.00655
00:03:00	2208.66	2062.47	2078.82	2358.54	2096.55	2202.46	2419.46	1981.31	2207.53	2293.12	2468.21		3	1.00626	1.00745	1.00457		0.999927	1.01245	0.999604
00:04:00	2179.3	2031.11	2055.62	2334.41	2061.73	2169.28	2389.37	1946.4	2187.92	2251.12	2440.5		4	1.00717	1.00917	1.00853		1.00901	1.01247	1.00401
00:05:00	2141.56	2016.14	2031.26	2329.18	2062.78	2161.06	2369.2	1942.48	2163.84	2234.22	2410		5	1.00502	1.00374	1.00277		0.999713	1.00723	0.997494
00:06:00	2134.16	2004.69	2008.35	2308.22	2045.59	2126.62	2351.43	1915.58	2160.55	2220.92	2399.25		6	1.00567	1.00644	1.00605		1.00593	1.00795	1.00609
00:07:00	2110.44	1990.15	2002.76	2296.43	2036.86	2115.52	2339.1	1910.06	2146.05	2214.53	2376.32		7	0.999447	1.0023	0.998037		0.995305	0.999842	0.994465
00:08:00	2100.84	1986.6	1975.76	2295.09	2021.34	2100.98	2320.96	1891.88	2128.89	2198.32	2354.89		8	0.992149	0.99899	0.99351		0.99506	0.996345	0.992792
00:09:00	2125.95	1983.18	1961.73	2281.43	2017.43	2081.51	2295.76	1837.67	2079.26	2162.73	2359.15		9	0.999466	1.00529	1.0006		0.996239	1.00797	1.00176
00:10:00	2057.37	1947.78	1948.29	2266.63	2011.72	2070.65	2306.15	1851.22	2073.16	2163.52	2352.89		10	1	1	1		1	1	1
00:11:00	2061.49	1976.73	1952.77	2264.27	1990.28	2065.22	2303.02	1824.33	2071.89	2157.04	2355.05		11	0.983628	1.05403	0.988216		0.989851	0.965095	0.952612
00:12:00	2057.94	1958.39	1938.81	2270.84	1983.8	2061.21	2306.24	1821.17	2086.09	2166.74	2344		12	0.985875	1.04545	0.945359		0.954927	0.93944	0.924787
00:13:00	2038.9	1948.87	1922.39	2253.95	1972.42	2047.66	2289.82	1821.21	2064.28	2158.96	2339.22		13	0.985758	1.03954	0.911956		0.92306	0.906598	0.896217
00:14:00	2026.02	1923.3	1891.69	2232.74	1927.63	2017.43	2270.64	1792.58	2035.45	2243.79	2335.78		14	0.986847	1.02245	0.877725		0.896865	0.874836	0.87543
00:15:00	2005.53	1913.31	1876.84	2213.87	1911.53	2007.38	2248.29	1784.5	2029.71	2242.34	2307.63		15	0.984451	1.01513	0.855265		0.872296	0.850926	0.84969
00:16:00	1992.11	1912.07	1884.23	2208.55	1893.02	1989.67	2241.96	1775.17	2026.98	2233.39	2310.31		16	0.988	1.01478	0.83227		0.860234	0.838886	0.838671
00:17:00	1988.49	1897.97	1876.36	2200.45	1906.51	1990.04	2244.75	1770.42	2021.98	2209.89	2301.89		17	0.978225	0.996642	0.807991		0.833256	0.807823	0.815275
00:18:00	1994.91	1907.32	1878.23	2189.82	1894.86	1978.97	2234.24	1778.19	2024.03	2213.31	2310.12		18	0.979038	0.984801	0.78553		0.813529	0.795006	0.804026
00:19:00	1976.88	1891.66	1861.92	2182.03	1882.67	1972.73	2218.82	1752.7	2005.14	2196.77	2283.84		19	0.974551	0.975643	0.771658		0.800998	0.778675	0.787025
00:20:00	1978.67	1894.89	1869.25	2194.09	1899.77	1972.76	2228.61	1760.64	2007.17	2205.62	2295.06		20	0.972638	0.966873	0.753324		0.78681	0.760904	0.774119
00:21:00	1974.46	1884.7	1858.58	2184.48	1882.27	1962.56	2214.14	1747.85	2003.57	2188.9	2278.03		21	0.976695	0.963091	0.745015		0.773152	0.748722	0.76373
00:22:00	1975.72	1889.76	1864.66	2184.92	1893.98	1963.96	2233.22	1754.21	2010.22	2202.45	2294.31		22	0.979382	0.956013	0.733389		0.765214	0.736199	0.754659
00:23:00	1963.51	1881.99	1849.81	2159.13	1873.97	1948.16	2207.41	1739.54	1986.65	2175.77	2268.4		23	0.972758	0.95017	0.720788		0.749353	0.725022	0.742808
00:24:00	1949.17	1875.78	1841.42	2145.9	1873.5	1941.34	2203.7	1736.54	1979.02	2168.67	2261.36		24	0.976663	0.941846	0.712636		0.736809	0.714897	0.73334
00:25:00	1963.54	1887.62	1854.57	2161.88	1875.72	1963.99	2223.61	1750.73	1996.43	2192.68	2281.1		25	0.965519	0.931062	0.688444		0.720139	0.693582	0.71573
00:26:00	1964.59	1877.67	1853.44	2165.73	1882.81	1948.46	2219.7	1734.5	1999.48	2189.29	2282.64		26	0.971131	0.933766	0.680899		0.715494	0.694537	0.715279
00:27:00	1932.43	1979.13	1831.6	2195.39	1863.7	1880.45	2114.51	1395.49	1661.66	2078.88	2123.71		27	0.969191	0.923257	0.669909		0.703801	0.679255	0.702044
00:28:00	1936.84	1963.02	1752.17	2173.22	1797.94	1830.46	2052.75	1282.33	1517.1	2044.49	2101.51		28	0.975312	0.923884	0.669451		0.69763	0.673272	0.698491
00:29:00	1936.61	1951.91	1690.26	2147.05	1737.94	1766.47	1989.33	1180.13	1408.65	2001.91	2063.47		29	0.96592	0.910707	0.651245		0.683775	0.65942	0.685871
00:30:00	1938.75	1919.84	1626.82	2130.01	1688.62	1704.59	1943.19	1108.19	1312.77	1968.14	2032.09		30	0.970113	0.908578	0.647604		0.676596	0.654014	0.681152
00:31:00	1934.04	1906.09	1585.19	2102.51	1642.37	1658	1886.06	1053.29	1251.15	1948.88	1996.1		31	0.97005	0.902662	0.633881		0.66746	0.646368	0.674589
00:32:00	1941.02	1905.43	1542.57	2105.73	1619.65	1634.54	1861.6	1009.59	1203.06	1940.91	1990.28		32	0.966565	0.897353	0.627055		0.662475	0.637482	0.666582
00:33:00	1921.81	1871.37	1497.57	2081.86	1568.86	1574.02	1809.66	970.328	1148.72	1900.83	1935.83		33	0.971212	0.890908	0.621059		0.655651	0.631675	0.66111
00:34:00	1923.41	1849.14	1455.94	2066.45	1531.72	1549.04	1784.69	936.931	1111.4	1886.23	1915.42		34	0.963761	0.884839	0.611095		0.643231	0.621757	0.650649
00:35:00	1914.59	1831.94	1430.22	2062.61	1508.12	1517.22	1746.96	901.02	1079.76	1862.67	1905.12		35	0.967962	0.875258	0.603388		0.639536	0.613754	0.645013
00:36:00	1910.84	1815.47	1396.24	2046.19	1481.41	1482.6	1718.31	877.386	1043.5	1851.46	1878.68		36	0.963722	0.876262	0.597128		0.631823	0.608167	0.641046
00:37:00	1918.81	1808.37	1380.84	2045.42	1455.7	1458.86	1695.25	861.943	1020.48	1829.15	1869		37	0.966669	0.875174	0.592545		0.628732	0.602605	0.635233
00:38:00	1924.09	1795.08	1359.3	1963.34	1440.75	1434.46	1675.12	845.355	1001.36	1821.73	1852.06		38	0.958466	0.86766	0.584433		0.616638	0.593651	0.627926
00:39:00	1911.07	1784.11	1335.94	1956.65	1410.89	1412.68	1648.81	829.133	974.628	1802.97	1834.37		39	0.969889	0.863345	0.579517		0.613661	0.589642	0.625501
00:40:00	1918.74	1768.48	1320.83	1973.67	1387.27	1392.95	1627.79	818.946	960.406	1790.45	1825.4		40	0.967777	0.85675	0.572499		0.60582	0.581599	0.617107
00:41:00	1896.85	1748.23	1275.99	1933.82	1355.88	1351.42	1588.71	796.52	933.758	1760.85	1791.99		41	0.958409	0.849162	0.56647		0.597714	0.576795	0.608857
00:42:00	1907.88	1753.31	1262.01	1946.12	1347.14	1353.28	1587.7	789.088	927.848	1762.54	1793.11		42	0.959321	0.844804	0.561746		0.594325	0.572721	0.604782
00:43:00	1904.06	1733.58	1241.64	1942.05	1325.12	1323.51	1558.33	782.787	908.287	1733.82	1759.06		43	0.963059	0.84094	0.556516		0.591844	0.569141	0.601051
00:44:00	1916.09	1734.75	1240.79	1953.41	1313.5	1311.85	1550.44	775.664	901.64	1731.26	1751.24		44	0.966202	0.839099	0.552374		0.58948	0.567145	0.59854
00:45:00	1897.64	1710.01	1207.05	1929.55	1287.41	1284.86	1522.43	760.848	885.344	1707.11	1725.79		45	0.964256	0.831991	0.546401		0.58444	0.560104	0.592205
00:46:00	1905.88	1706.02	1200.3	1938.24	1273.9	1274.32	1511.95	757.007	878.671	1701.75	1718.63		46	0.96468	0.824707	0.542831		0.577708	0.553635	0.585292
00:47:00	1905.75	1694.91	1174.86	1915.44	1256.7	1259.43	1497.38	750.606	869.41	1690.39	1704.88		47	0.957311	0.82325	0.536968		0.573968	0.550101	0.583467
00:48:00	1898.9	1684.94	1162.21	1932.1	1247.31	1242.11	1479.61	744.141	860.764	1681.5	1696.09		48	0.962743	0.822315	0.534596		0.568822	0.548438	0.579694
00:49:00	1908.03	1672.84	1151.1	1924.99	1234.46	1230.8	1467.47	738.757	853.147	1672.06	1685.95		49	0.96025	0.818022	0.529895		0.563722	0.542452	0.574306
00:50:00	1893.4	1661.44	1132.63	1920.23	1211.08	1211.47	1444.24	727.187	845.786	1652.86	1665.73		50	0.960203	0.811834	0.526506		0.56113	0.538899	0.571059
00:51:00	1901.65	1643.45	1118.35	1914.64	1204.12	1195.88	1431.73	724.323	839.852	1650.27	1645.35		51	0.95571	0.807263	0.518771		0.553054	0.531946	0.564683
00:52:00	1893.32	1645.34	1106.74	1921.3	1189.6	1184.99	1422.93	720.729	829.256	1639.94	1643.79		52	0.949423	0.793777	0.510328		0.547348	0.524318	0.561347
00:53:00	1899.11	1643.29	1098.25	1920.19	1183.78	1174.15	1410.03	717.246	826.979	1630.06	1633.74		53	0.958172	0.797405	0.511464		0.546024	0.526117	0.557994
00:54:00	1882.99	1629.18	1083.21	1917.77	1161.01	1156.71	1393.81	708.579	814.691	1613.22	1606.23		54	0.957773	0.793658	0.510843		0.546233	0.521223	0.558468
00:55:00	1905.44	1621.08	1074.1	1910.46	1155.4	1148.9	1388.42	707.148	813.302	1606.99	1601.48		55	0.955798	0.788912	0.506621		0.537935	0.517313	0.55477
00:56:00	1901.29	1608.7	1061.1	1914	1140.64	1133.23	1369.79	706.388	808.433	1587.66	1585.33		56	0.951106	0.788434	0.505205		0.53475	0.513482	0.551705
00:57:00	1882.88	1594.45	1049.92	1904.59	1125.38	1123.87	1351.48	699.504	798.779	1565.7	1567.74		57	0.956037	0.784258	0.499408		0.531385	0.508729	0.5467
00:58:00	1884.67	1586.27	1041.16	1898.78	1119	1115.93	1342.43	695.724	797.397	1561.28	1564.23		58	0.951402	0.773413	0.493615		0.524572	0.508011	0.542609
00:59:00	1892.02	1579.01	1031.47	1912.35	1114.33	1108.95	1334.15	693.651	796.959	1556.16	1550.5		59	0.954691	0.774195	0.496877		0.527265	0.506946	0.539276
01:00:00	1898.19	1575.56	1023.79	1919.43	1109.88	1105.06	1328.58	693.904	792.274	1548.38	1538.35		60	0.956551	0.783575	0.496721		0.526731	0.509645	0.541543
01:01:00	1894.37	1562.21	1012.72	1990.25	1100.39	1091.34	1314.52	687.239	786.773	1536.46	1524.63		61	0.959835	0.773557	0.492713		0.522742	0.503888	0.535856
01:02:00	1895.2	1548.53	1006.11	1897.12	1087.71	1078.74	1299.17	679.622	783.81	1523.79	1516.53		62	0.955171	0.765039	0.485092		0.51743	0.497645	0.535478
01:03:00	1880.72	1545.8	995.24	1908.02	1080.67	1071.85	1295.12	679.681	781.41	1507.11	1505.98		63	0.949732	0.755	0.483453		0.509935	0.491524	0.52905
01:04:00	1891.4	1544.04	990.845	1996.76	1070.98	1068.61	1286.75	684.976	784.636	1512.28	1501.59		64	0.956281	0.759764	0.483119		0.513542	0.493883	0.531149
01:05:00	1886.5	1535.98	982.132	1991.15	1061.38	1056.95	1274.79	679.183	775.564	1496.67	1478.45		65	0.956334	0.755643	0.478286		0.506927	0.489096	0.523259
01:06:00	1886.41	1524.36	975.85	1913.36	1056.5	1050.03	1267.58	678.075	773.323	1489.38	1475.85		66	0.951942	0.748964	0.472185		0.501984	0.486489	0.52065
01:07:00	1877.58	1515.78	961.513	1885.7	1041.29	1036.48	1253.43	670.373	765.665	1473.04	1454.83		67	0.956876	0.748805	0.472106		0.501025	0.483742	0.519608
01:08:00	1865.23	1490.46	945.864	1890.22	1030.55	1021.62	1246.02	665.917	760.847	1459.54	1440.66		68	0.955417	0.7459	0.470217		0.498292	0.48263	0.516752
01:09:00	1882.42	1497.27	947.97	1896.92	1028.06	1025.12	1238.58	667.925	762.74	1451.05	1440.22		69	0.946027	0.735454	0.465916		0.492125	0.47717	0.509017
01:10:00	1881.63	1490.23	946.82	1903.08	1028.45	1015.58	1239.63	671.22	762.046	1448.16	1438.16		70	0.950134	0.735715	0.466732		0.492655	0.476047	0.510425
01:11:00	1877.75	1481.32	938.994	1889.7	1012.83	1007.97	1231.42	667.907	758.831	1438.38	1427.7
01:12:00	1868.53	1480.42	936.37	1895.6	1006.83	1000.5	1224.62	665.685	754.432	1423.71	1410.98
01:13:00	1878.22	1472.58	925.626	1897.15	1000.49	991.241	1213.51	660.615	753.395	1424.24	1403.21
01:14:00	1869.12	1452.22	914.888	1876.63	987.667	989.842	1204.43	657.291	748.76	1412.22	1394.56
01:15:00	1875.58	1453.69	920.934	1883.3	992.737	987.767	1197.03	661.846	751.667	1406.2	1388.31
01:16:00	1879.23	1471.3	920.645	1906.64	991.732	993.026	1202.06	662.104	751.634	1403.16	1398.37
01:17:00	1885.68	1452.49	913.216	1915.12	984.222	981.809	1189.44	657.453	749.353	1398.6	1381.04
01:18:00	1876.52	1436.49	899.091	1887.54	974.221	969.644	1188.6	660.528	749.636	1382.75	1367.31
01:19:00	1865.83	1417.64	896.054	1880.72	960.108	957.717	1174.33	651.807	742.583	1367.97	1347.95
01:20:00	1878.7	1426.59	895.434	1887.16	966.9	962.314	1178.99	656.128	745.761	1371.85	1356.6
01:21:00	1878.81	1418.85	886.477	1888.08	954.446	952.986	1161.48	652.338	741.698	1359.12	1346.1
01:22:00	1870.18	1406.31	875.169	1870.99	945.138	947.906	1155.69	652.326	737.363	1350.44	1329.93
01:23:00	1879.87	1406.01	875.022	1879.78	943.332	942.554	1153.37	652.591	737.875	1345.51	1327.6
01:24:00	1877	1400.56	871.522	1873.96	938.188	940.388	1147.03	648.821	735.549	1336.94	1313.65
01:25:00	1858.56	1380.94	863.55	1860.47	926.576	929.75	1129.87	647.686	731.332	1326.97	1307.36
01:26:00	1866.62	1381.43	865.063	1867.19	927.573	927.56	1132.99	645.807	733.314	1325.71	1303.03
01:27:00	1861.13	1368.85	853.145	1866.86	915.075	921.994	1126.2	646.248	724.44	1314.34	1290.62
01:28:00	1872.4	1368.9	851.187	1868.6	914.081	920.075	1125.21	640.972	728.089	1309.81	1288.29
01:29:00	1870.17	1361.48	850.914	1863.86	908.469	911.379	1115.58	643.156	727.874	1299.79	1278.46
01:30:00	1874.25	1352.42	848.462	1872.09	910.012	913.333	1118.48	643.664	730.259	1296.69	1278.83
01:31:00	1870.96	1349.28	843.203	1865.79	901.351	902.362	1110.14	641.212	724.953	1290.26	1264.63
01:32:00	1854.13	1339.09	834.302	1857.56	896.399	900.12	1102.37	639.479	723.287	1279.84	1254.1
01:33:00	1850.84	1324.64	825.696	1847.55	894.605	892.201	1087.67	633.241	723.354	1269.19	1241.73
01:34:00	1846.28	1324.74	829.257	1854.29	883.522	885.094	1094.09	635.97	720.162	1265.61	1236.74
01:35:00	1858.92	1323.48	828.381	1856.61	884.888	895.442	1092.34	641.585	722.106	1264.14	1238.63
01:36:00	1855.3	1310.21	823.016	1851.96	877.368	881.354	1084.14	634.898	714.354	1255.14	1228.16
01:37:00	1856.71	1303.88	812.785	1847.89	878.928	879.675	1079.43	634.042	719.62	1245.02	1220.25
01:38:00	1853.38	1300.71	814.014	1844.54	873.287	877.419	1068.52	632.551	711.049	1240.98	1213.18
01:39:00	1857.46	1298.65	814.965	1846.24	866.459	875.422	1065.8	631.77	713.435	1230.35	1213.61
01:40:00	1863.66	1294.73	815.309	1859.33	869.672	871.733	1069.27	632.962	718.578	1235.28	1212.79
01:41:00	1857.89	1279.85	808.281	1840.36	862.631	868.832	1060.41	628.699	708.521	1229.74	1204.52
01:42:00	1848.2	1276.2	802.758	1840.03	854.375	861.577	1051.68	623.54	705.531	1210.73	1189.75
01:43:00	1861.74	1291.71	811.177	1855.2	863.984	867.886	1058.01	632.153	716.219	1215.6	1198.12
01:44:00	1845.62	1260.66	799.806	1834.24	847.899	859.306	1050.54	628.193	709.994	1206.01	1185.25
01:45:00	1853.9	1262.66	800.394	1847.88	849.102	860.693	1049.62	629.966	713.42	1212.15	1189.37
01:46:00	1853.71	1260.39	792.256	1850.08	849.319	857.04	1050.83	629.383	712.29	1206.62	1174.83
01:47:00	1857.25	1258.03	793.862	1844.92	843.408	851.87	1042.71	626.696	708.034	1191.63	1174.24
01:48:00	1853.54	1241.05	790.618	1836.06	839.631	842.384	1037.65	625.341	704.766	1184.95	1163.61
01:49:00	1853.24	1246.81	785.349	1835.34	835.297	842.055	1031.58	624.032	705.063	1181.22	1156.42
01:50:00	1847.16	1238.85	783.419	1839.78	833.697	845.428	1034.27	627.493	704.113	1176.27	1155.45
01:51:00	1845.93	1228.99	776.034	1826.98	826.027	838.771	1021.99	625.022	705.694	1167.59	1151.66
01:52:00	1838.45	1223.45	777.24	1822.97	828.22	833.163	1023.37	623.804	703.224	1157.68	1138.96
01:53:00	1868.33	1223.07	774.128	1836.48	831.566	841.604	1018.2	622.563	706.573	1167.05	1147.95
01:54:00	1848.55	1217.68	774.048	1827.49	817.142	832.272	1018.62	622.017	702.148	1151.95	1131.71
01:55:00	1848.57	1211.27	774.534	1836.35	819.852	833.931	1016.99	624.521	702.683	1153.75	1130.35
01:56:00	1843.01	1213.44	768.62	1833.16	816.385	831.964	1009.02	626.207	702.701	1149.41	1128.47
01:57:00	1847.77	1200.97	770.127	1831.38	818.053	829.949	1008.73	620.94	701.627	1143.8	1123.73
01:58:00	1848.82	1202.77	769.744	1830.45	814.138	824.923	1007.44	620.613	702.211	1142.06	1124.18
01:59:00	1845.09	1192.27	766.039	1826.09	807.055	822.249	1001.35	622.289	698.91	1136.39	1114.64
02:00:00	1837.46	1190.31	760.613	1825.43	806.558	822.607	993.47	619.271	696.513	1130.58	1107.86
02:01:00	1832.75	1180.55	754.94	1820.96	802.111	812.386	993.107	615.702	699.09	1125.31	1100.97
02:02:00	1831.03	1180.1	752.998	1811.53	797.323	816.363	991.175	615.844	693.031	1114.36	1098.48
02:03:00	1852.14	1171.7	761.303	1831.49	802.627	816.701	997.339	622.882	701.889	1119.37	1100.59
02:04:00	1845.66	1167.8	747.102	1819.42	796.238	814.565	963.633	614.091	696.261	1105.71	1091.42
02:05:00	1852.35	1165.28	754.222	1831.84	795.179	814.874	985.146	619.132	699.741	1117.86	1096.9
02:06:00	1845.05	1164.5	755.255	1829.43	796.994	810.338	974.18	618.983	700.195	1108.99	1089.51
02:07:00	1842.38	1153.82	750.751	1819.04	790.965	804.307	973.056	616.926	695.04	1097.02	1076.06
02:08:00	1830.02	1148.64	743.256	1815.83	784.296	802.623	965.176	613.549	689.928	1097.37	1074.94
02:09:00	1829.55	1146.29	745.51	1813.17	787.307	797.31	962.657	613.715	694.355	1091.11	1071.34
02:10:00	1833.23	1139.7	745.812	1818.04	788.319	803.455	966.149	615.245	699.079	1092.96	1074.18
02:11:00	1840.8	1141.48	744.027	1819.16	781.591	799.469	951.501	618.863	692.273	1083.53	1067.01
02:12:00	1825.07	1133.39	738.872	1810.85	779.431	791.94	945.115	614.897	690.827	1078.87	1057.19
02:13:00	1843.97	1137.72	745.188	1829.38	784.773	798.91	950.601	616.443	692.953	1087.38	1071.46
02:14:00	1823.02	1125.28	739.005	1816.99	778.552	792.197	943.027	615.152	693.381	1081.07	1060.99
02:15:00	1835.29	1123.96	736.618	1810.48	776.818	791.281	941.807	611.98	687.439	1068.92	1051.43
02:16:00	1860.01	1124.94	741.815	1828.33	773.421	793.115	940.679	612.799	692.297	1074.01	1061.75
02:17:00	1808.88	1111.27	732.162	1803.43	767	781.146	932.735	611.126	688.973	1063.67	1039.54
02:18:00	1820.43	1109.01	729.247	1807.8	768.858	783.169	926.764	610.199	687.287	1060.31	1038.77
02:19:00	1830.38	1115.84	732.197	1822.71	771.275	789.716	928.832	611.821	692.854	1058.71	1044.99
02:20:00	1831.74	1106.87	731.363	1821.08	766.149	781.56	933.798	615.679	688.499	1052.84	1041.65
02:21:00	1837.29	1104.84	733.556	1819.38	771.615	786.731	928.601	614.027	688.357	1055.76	1041.31
02:22:00	1820.17	1092.41	728.228	1814.13	759.661	780.902	920.825	610.447	686.079	1046.82	1033.1
02:23:00	1826.16	1091.88	726.829	1809.12	761.781	776.819	922.511	608.584	687.168	1043.72	1028.12
02:24:00	1813.12	1092.14	723.505	1805.92	756.158	775.763	917.132	609.587	685.107	1036.57	1020.1
02:25:00	1825.26	1088.6	726.404	1814.46	765.576	777.266	923.937	609.344	685.96	1041.74	1027.93
02:26:00	1924.04	1094.02	755.366	2056.9	777.645	808.757	936.756	644.824	726.602	1035.12	964.683
02:27:00	1944.45	1032.74	742.576	2048.43	762.689	796.848	918.245	642.221	723.963	986.186	1206.09
02:28:00	1959.09	980.827	732.389	2036.14	750.462	783.897	905.603	640.847	724.087	965.996	1178.85
02:29:00	1921.37	942.023	714.415	1930.83	738.935	774.568	885.398	639.436	723.734	935.471	1149.49
02:30:00	2011	902.132	714.477	1921.84	730.615	765.024	875.435	639.541	720.676	909.349	1119.84
02:31:00	1905.99	873.324	705.271	1915.93	721.734	761.218	863.208	637.007	722.015	890.799	1098.51
02:32:00	1951.37	849.634	699.722	1917.03	721.115	747.131	857.78	635.555	720.027	870.646	1087.76
02:33:00	1980.03	832.389	700.487	1923.47	717.761	747.752	850.059	635.335	724.122	867.807	1077.48
02:34:00	1843.08	798.044	684.939	1900.92	710.724	740.449	839.461	633.124	718.643	846.338	846.258
02:35:00	1959.83	787.654	689.104	1783.34	707.696	732.932	836.291	637.175	721.717	838.323	1047.73
02:36:00	1962.13	767.036	682.081	1782.55	703.787	727.42	830.951	631.663	715.495	827.513	1039.61
02:37:00	1903.29	753.077	682.171	1779.45	699.279	727.983	821.465	630.069	714.531	817.929	1029.1
02:38:00	1899.47	736.783	673.511	1774.12	692.964	720.864	813.496	627.163	716.078	808.714	1016.06
02:39:00	1920.94	734.382	675.944	1782.34	696.067	720.321	811.224	632.696	718.579	806.954	1017.73
02:40:00	1942.66	719.581	674.82	1770.68	690.322	718.148	805.751	625.589	715.163	800.147	1008.16
02:41:00	1911.04	717.002	670.769	1775.86	694.322	722.03	800.877	633.139	717.996	796.804	1014.84
02:42:00	1923.61	711.23	671.688	1782.4	692.81	715.133	805.906	634.946	722.507	800.254	1007.81
02:43:00	2086.25	704.519	674.964	1783.12	694.133	715.565	789.385	631.47	717.784	789.516	1004.7
02:44:00	1956	704.06	670.588	1779.93	691.055	714.274	785.872	630.976	720.96	791.009	999.612
02:45:00	1973.59	697.769	671.288	1777.47	690.505	710.185	787.329	635.026	717.626	787.121	1000.93
02:46:00	1917.73	690.99	666.525	1763.16	684.971	710.297	773.798	625.467	712.157	780.721	993.849
02:47:00	1961.8	697.703	670.689	1777.96	688.195	709.836	783.182	633.388	718.083	782.523	995.825
02:48:00	1964.93	688.41	664.282	1756.52	685.775	702.421	772.567	628.087	714.792	775.519	985.989
02:49:00	1936.3	689.7	669.808	1767.37	687.436	710.963	774.164	633.983	716.937	779.077	984.567
02:50:00	1967.17	684.266	669.901	1762.24	687.945	706.524	768.113	628.763	713.238	778.371	985.439
02:51:00	1963.06	678.831	667.329	1760	688.894	704.56	768.347	630.005	713.506	773.187	977.977
02:52:00	1959.72	682.728	669.87	1766.71	689.828	707.801	767.532	635.005	719.211	781.651	986.759
02:53:00	1979.7	681.87	669.029	1757.42	686.933	708.204	765.597	630.99	719.161	777.967	985.898
02:54:00	1901.44	680.656	670.108	1761.37	688.361	709.331	766.73	628.218	721.262	774.98	985.927
02:55:00	1947.48	674.163	663.924	1748.12	682.156	700.698	759.37	623.988	713.853	772.194	977.667
02:56:00	1949.12	679.608	669.398	1758.37	687.443	703.739	766.847	629.732	720.172	775.915	985
02:57:00	1931.49	677.346	665.52	1756.71	683.117	705.111	761.376	631.234	713.168	775.255	977.929
02:58:00	1942.04	676.52	665.478	1754.25	683.587	701.279	762.903	628.511	713.552	775.186	977.583
02:59:00	1918.14	673.471	663.234	1753.98	684.691	702.015	759.568	632.042	712.992	773.646	974.791
03:00:00	1916.29	673.023	659.529	1751.12	683.244	700.701	756.597	629.046	712.884	770.394	974.696
~End
Original Filename: 20170613mc1_gef assay with GST_atgt8; Date Last Saved: 14.06.2017 18:35:48
