# Supplementary material for: Molecular mechanism to target the endosomal Mon1-Ccz1 GEF complex to the pre-autophagosomal structure
Source: eLife. 2018 Feb 15;7:e31145. doi: 10.7554/eLife.31145 (PMC5841931; doi:10.7554/eLife.31145)
Supplement: Figure 5—source data 4. [file elife-31145-fig5-data4.xlsx]

## Sheet: Sheet1
wt-MC1(nM)	t	Kobs		t	Kobs		t	Kobs
0	58.72	0.01703		31.32	0.0319285		32.75	0.0305344
10	24.14	0.041425		17.13	0.0583771		17.78	0.056243
20	8.15	0.122699		13.17	0.0759301		12.19	0.0820345
80	3.96	0.252525		5.11	0.195695		4.63	0.215983
LIR1(nM)	t	Kobs		t	Kobs		t	Kobs
0	58.72	0.01703		31.32	0.0319285		32.75	0.0305344
10	19.37	0.0516262		19.5	0.0512821		16.96	0.0589623
20	7.93	0.126103		15.01	0.0666223		14.43	0.0693001
80	3.43	0.291545		5.06	0.197628		6.65	0.150376
nM	wt	LIR1
0	0.0264976	0.0264976
10	0.052015	0.0539568
20	0.0936049	0.0873419
80	0.222696	0.213183
wt	2.4
LIR1	2.3
				Mean		STDEV.P
wt	2.9	2.3	2	2.4		0.374166
LIR1	3.4	2.1	1.4	2.3		0.828654
wt	Kobs	Kobs	Kobs		mean
0	0.01703	0.0319285	0.0305344		0.0264976
10	0.041425	0.0583771	0.056243		0.052015
20	0.12285	0.0759301	0.0820345		0.0936049
80	0.25641	0.195695	0.215983		0.222696
LIR1	Kobs	Kobs	Kobs
0	0.01703	0.0319285	0.0305344		0.0264976
10	0.0516262	0.0512821	0.0589623		0.0539568
20	0.126103	0.0666223	0.0693001		0.0873419
80	0.291545	0.197628	0.150376		0.213183
wt	t	Kobs		t	Kobs		t	Kobs
NO GEF	32.75	0.0305344		28.66	0.0348918		40.62	0.0246184
MC1	24.69	0.0405022		23.01	0.0434594		25.14	0.0397772
MC1+Atg8	15.85	0.0630915		17.68	0.0565611		17.11	0.0584454
LIR1	t	Kobs		t	Kobs		t	Kobs
NO GEF	45.72	0.0218723		44.41	0.0225175		49.2	0.0203252
MC1	28.06	0.0356379		32.84	0.0304507		29.56	0.0338295
MC1+Atg8	27.78	0.0359971		33.93	0.0294724		31.3	0.0319489
				mean_Kobs
wt	wt-MC1	wt-MC1	wt-MC1					wt-MC1	wt-MC1	wt-MC1
NO GEF	0.0305344	0.0348918	0.0246184	0.0300149			0	0.0305344	0.0348918	0.0246184
MC1	0.0405022	0.0434594	0.0397772	0.0412463			4	0.0405022	0.0434594	0.0397772
MC1+Atg8	0.0630915	0.0565611	0.0584454	0.059366			10	0.0630915	0.0565611	0.0584454
LIR1								mt-MC1	mt-MC1	mt-MC1
NO GEF	0.0218723	0.0225175	0.0203252	0.0215716			0	0.0218723	0.0225175	0.0203252
MC1	0.0356379	0.0304507	0.0338295	0.033306			4	0.0356379	0.0304507	0.0338295
MC1+Atg8	0.0359971	0.0294724	0.0319489	0.0324728			10	0.0359971	0.0294724	0.0319489
	wt-MC1	mt-MC1
0	0.0300149	0.0215716
4	0.0412463	0.033306
10	0.059366	0.0324728
				MEAN	STDEV.P
wt+Atg8	3.3	2.2	3.4	2.96667	0.54365
LIR1+Atg8	1.3	0.6	1	0.966667	0.286744
	No Addition	Additional Atg8-HIS
wt	2.4	2.9		0.37	0.54
LIR1	2.3	1		0.82	0.29
